# Supplementary material for: Comparative Analysis of Luisia (Aeridinae, Orchidaceae) Plastomes Shed Light on Plastomes Evolution and Barcodes Investigation
Source: Genes (Basel). 2023 Dec 22;15(1):20. doi: 10.3390/genes15010020 (PMC10815154; doi:10.3390/genes15010020)
Supplement: Supplementary file 1 [file genes-15-00020-s001.zip › Supplementary Table S1.xlsx]

## Sheet: Sheet1
Taxa	Voucher	Accession No.
Acampe papillosa (Lindl.) Lindl.	Liu3246	MN124418
Acampe rigida (Buch.-Ham. ex Sm.) P.F.Hunt	Liu4441	MN124419
Cleisostoma paniculatum (Ker Gawl.) Garay	Liu2400	MN124416
Cleisostoma simondii var. guangdongense Z.H.Tsi	Liu2592	MN124424
Gastrochilus calceolaris (Buch.-Ham. ex Sm.) D.Don	-	MH719016
Holcoglossum rupestre (Hand.-Mazz.) Garay	9015	MK442932
Pelatantheria scolopendrifolia (Makino) Aver.	PDBK2015-1268	KX871232
Phalaenopsis formosana (Christenson) J.M.H.Shaw	-	AY916449
Phalaenopsis equestris (Schauer) Rchb.f.	-	JF719062
Pomatocalpa spicatum Breda	Liu4589	MN124411
Robiquetia spathulata (Blume) J.J.Sm.	Liu5248	MN124410
Schoenorchis tixieri (Guillaumin) Seidenf.	Liu4123	MN124407
Smitinandia micrantha (Lindl.) Holttum	Liu21119	MN124406
Staurochilus sp.	Lior012	MN124441
Stereochilus dalatensis (Guillaumin) Garay	Lior003	MN124431
Thrixspermum centipeda Lour.	MH Li081	MW057769
Trichoglottis cirrhifera Teijsm. & Binn.	MH Li117	OR459850
Trichoglottis ionosma (Lindl.) J.J.Sm.	MH Li130	OR459851
Trichoglottis lanceolaria Blume	MH Li127	OR459852
Trichoglottis orchidea (J.Koenig) Garay	MH Li122	OR459853
Trichoglottis subviolacea (Llanos) Merr.	MH Li126	OR459854
Trichoglottis philippinensis Lindl.	Lior075	MN124404
Trichoglottis latisepala Ames	Lior074	MN124432
Vanda falcata (Thunb.) Beer	PDBK 2014-0944	KT726909
Vandopsis lissochiloides (Gaudich.) Pfitzer	Lior070	MN124443
Cymbilabia undulata (Lindl.) D.K.Liu & Ming H.Li	Lior078	MN124402
Outgroup
Calanthe davidii Franch.	Y.Q.Chen014	MN708353
Calanthe rubens Ridl.	Y.Q.Chen033	MN708352
Calypso bulbosa (L.) Oakes	KUN:Zhou HC 1321	MN990433
Cattleya crispata (Thunb.) Van den Berg	-	KP168671
Masdevallia coccinea Linden ex Lindl.	-	KP205432
Tridactyle tridactylites (Rolfe) Schltr.	-	MW760855

## Sheet: Sheet2
Taxa	Voucher	Accession No.
Acampe papillosa	Liu3246	MN124418
Cleisostoma arietinum	Liu6991	MN124420
Cleisostoma crochetii	Lior005	MN124440
Cleisostoma paniculatum	Liu2400	MN124416
Cymbilabia undulata	Lior078	MN124402
Gastrochilus calceolaris	Liu4362	MN124413
Holcoglossum flavescens	15165	MK442926
Holcoglossum quasipinifolium	JXH028	MK442931
Holcoglossum rupestre	9015	MK442932
Holcoglossum wangii	13881	MK442935
Luisia amesiana	20220501ly	OR948794
Luisia hancockii_1	20220502ly	OR948795
Luisia hancockii_2	-	OR030420
Luisia morsei	20220503ly	OR948796
Luisia thailandica	20220504ly	OR948797
Luisia trichorhiza	20220505ly	OR948798
Paraphalaenopsis denevel	-	OR159903
Paraphalaenopsis labukensis	-	OR159902
Paraphalaenopsis laycockii	-	OR159904
Pelatantheria scolopendrifolia	PDBK2015-1268	KX871232
Phalaenopsis equestris	-	JF719062
Phalaenopsis hygrochila	Liu3336	MN124430
Pomatocalpa spicatum	Liu4589	MN124411
Robiquetia spathulata	Liu5248	MN124410
Schoenorchis tixieri	Liu4123	MN124407
Smitinandia micrantha	Liu21119	MN124406
Staurochilus sp. Lior 012	Lior012	MN124441
Thrixspermum japonicum	PDBK2015-1270	KX871234
Trichoglottis latisepala	Lior074	MN124432
Vanda brunnea	13059	MK442937
Vanda falcata	PDBK 2014-0944	KT726909
Outgroup
Calanthe davidii	Y.Q.Chen014	MN708353
Calanthe rubens	Y.Q.Chen033	MN708352
Calypso bulbosa	KUN:Zhou HC 1321	MN990433
Cattleya crispata	-	KP168671
Masdevallia coccinea	-	KP205432
Tridactyle tridactylites	-	MW760855
