# Supplementary material for: Comparative Analysis of Luisia (Aeridinae, Orchidaceae) Plastomes Shed Light on Plastomes Evolution and Barcodes Investigation
Source: Genes (Basel). 2023 Dec 22;15(1):20. doi: 10.3390/genes15010020 (PMC10815154; doi:10.3390/genes15010020)
Supplement: Supplementary file 1 [file genes-15-00020-s001.zip › Supplementary Table S2.xlsx]

## Sheet: Sheet8
Taxa	Category	Number	Total
L. amesiana	1	36	57
L. amesiana	2	9
L. amesiana	3	4
L. amesiana	4	6
L. amesiana	5	2
L. hancockii_1	1	43	64
L. hancockii_1	2	10
L. hancockii_1	3	4
L. hancockii_1	4	5
L. hancockii_1	5	2
L. hancockii_2	1	40	60
L. hancockii_2	2	12
L. hancockii_2	3	2
L. hancockii_2	4	5
L. hancockii_2	5	1
L. morsei	1	36	56
L. morsei	2	10
L. morsei	3	4
L. morsei	4	4
L. morsei	5	2
L. thailandica	1	38	61
L. thailandica	2	9
L. thailandica	3	6
L. thailandica	4	6
L. thailandica	5	2
L. trichorhiza	1	35	59
L. trichorhiza	2	9
L. trichorhiza	3	7
L. trichorhiza	4	6
L. trichorhiza	5	2

## Sheet: Sheet7
Taxa	Category	Number
L. amesiana	A/T	36
L. amesiana	AG/CT	2
L. amesiana	AT/AT	7
L. amesiana	AAT/ATT	4
L. amesiana	AAAT/ATTT	2
L. amesiana	AATT/AATT	1
L. amesiana	AGAT/ATCT	1
L. amesiana	AGCG/CGCT	2
L. amesiana	AAATG/ATTTC	1
L. amesiana	AAGAT/ATCTT	1
L. hancockii_1	A/T	43
L. hancockii_1	AG/CT	2
L. hancockii_1	AT/AT	8
L. hancockii_1	AAT/ATT	4
L. hancockii_1	AAAT/ATTT	1
L. hancockii_1	AATT/AATT	1
L. hancockii_1	AGAT/ATCT	1
L. hancockii_1	AGCG/CGCT	2
L. hancockii_1	AAGAT/ATCTT	1
L. hancockii_1	AATAT/ATATT	1
L. hancockii_2	A/T	40
L. hancockii_2	AG/CT	2
L. hancockii_2	AT/AT	10
L. hancockii_2	AAT/ATT	2
L. hancockii_2	AAAT/ATTT	1
L. hancockii_2	AATT/AATT	1
L. hancockii_2	AGAT/ATCT	1
L. hancockii_2	AGCG/CGCT	2
L. hancockii_2	AAGAT/ATCTT	1
L. morsei	A/T	36
L. morsei	AG/CT	2
L. morsei	AT/AT	8
L. morsei	AAT/ATT	4
L. morsei	AAAT/ATTT	1
L. morsei	AATT/AATT	1
L. morsei	AGCG/CGCT	2
L. morsei	AAGAT/ATCTT	1
L. morsei	AATAT/ATATT	1
L. thailandica	A/T	38
L. thailandica	AG/CT	2
L. thailandica	AT/AT	7
L. thailandica	AAT/ATT	6
L. thailandica	AAAT/ATTT	1
L. thailandica	AATT/AATT	2
L. thailandica	AGAT/ATCT	1
L. thailandica	AGCG/CGCT	2
L. thailandica	AAGAT/ATCTT	1
L. thailandica	AAAATT/AATTTT	1
L. trichorhiza	A/T	35
L. trichorhiza	AG/CT	2
L. trichorhiza	AT/AT	7
L. trichorhiza	AAT/ATT	7
L. trichorhiza	AAAT/ATTT	1
L. trichorhiza	AATT/AATT	2
L. trichorhiza	AGAT/ATCT	1
L. trichorhiza	AGCG/CGCT	2
L. trichorhiza	AAGAT/ATCTT	1
L. trichorhiza	AATAT/ATATT	1
