# Supplementary material for: Comparative Analysis of Luisia (Aeridinae, Orchidaceae) Plastomes Shed Light on Plastomes Evolution and Barcodes Investigation
Source: Genes (Basel). 2023 Dec 22;15(1):20. doi: 10.3390/genes15010020 (PMC10815154; doi:10.3390/genes15010020)
Supplement: Supplementary file 1 [file genes-15-00020-s001.zip › Supplementary Table S3.xlsx]

## Sheet: Sheet1
Taxa	Category	Number	Total
L. amesiana	F	25	49
L. amesiana	P	23
L. amesiana	R	1
L. amesiana	C	0
L. hancockii_1	F	19	48
L. hancockii_1	P	22
L. hancockii_1	R	6
L. hancockii_1	C	1
L. hancockii_2	F	14	42
L. hancockii_2	P	23
L. hancockii_2	R	4
L. hancockii_2	C	1
L. morsei	F	19	48
L. morsei	P	22
L. morsei	R	6
L. morsei	C	1
L. thailandica	F	16	47
L. thailandica	P	21
L. thailandica	R	7
L. thailandica	C	3
L. trichorhiza	F	18	49
L. trichorhiza	P	20
L. trichorhiza	R	9
L. trichorhiza	C	2

## Sheet: Sheet2
L. amesiana	L. hancockii_1	L. hancockii_2	L. morsei	L. thailandica	L. trichorhiza
90	59	61	59	61	61
90	56	59	56	59	59
90	48	52	48	48	48
90	48	49	48	48	48
84	48	48	48	48	48
84	48	48	48	48	48
84	46	48	46	46	48
84	43	48	43	39	46
81	43	46	43	39	40
75	43	39	43	38	39
75	43	39	43	35	39
75	42	38	42	35	38
75	42	37	42	34	37
72	42	35	42	34	36
66	42	34	42	34	35
66	39	34	39	34	35
66	39	34	39	34	34
66	38	34	38	33	34
63	37	34	37	33	34
59	37	33	37	33	34
57	37	33	37	33	34
57	36	33	36	32	33
57	35	33	35	32	33
57	35	33	35	32	33
56	33	33	33	32	33
54	32	32	32	32	32
48	32	31	32	31	32
48	31	31	31	31	32
48	31	31	31	31	32
48	31	31	31	31	31
48	31	31	31	31	31
48	31	31	31	31	31
48	31	30	31	31	31
48	30	30	30	30	31
46	30	30	30	30	31
45	30	30	30	30	31
43	30	30	30	30	31
43	30	30	30	30	30
43	30	30	30	30	30
43	30	30	30	30	30
39	30	30	30	30	30
39	30	30	30	30	30
38	30		30	30	30
36	30		30	30	30
36	30		30	30	30
36	30		30	30	30
36	30		30	30	30
36	30		30		30
33					30
