# Supplementary material for: Comparative Analysis of Luisia (Aeridinae, Orchidaceae) Plastomes Shed Light on Plastomes Evolution and Barcodes Investigation
Source: Genes (Basel). 2023 Dec 22;15(1):20. doi: 10.3390/genes15010020 (PMC10815154; doi:10.3390/genes15010020)
Supplement: Supplementary file 1 [file genes-15-00020-s001.zip › Supplementary Table S4.xlsx]

## Sheet: Sheet1
	L. amesiana	L. hancockii_1	L. hancockii_2	L. morsei	L. thailandica	L. trichorhiza
UAA	1.368	1.368	1.368	1.368	1.456	1.5
UAG	0.838	0.838	0.838	0.838	0.75	0.75
UGA	0.794	0.794	0.794	0.794	0.794	0.75
GCA	1.224	1.22	1.228	1.22	1.213	1.215
GCC	0.543	0.539	0.543	0.539	0.547	0.544
GCG	0.367	0.363	0.363	0.363	0.367	0.368
GCU	1.866	1.878	1.866	1.878	1.872	1.874
UGC	0.516	0.523	0.525	0.53	0.53	0.535
UGU	1.484	1.477	1.475	1.47	1.47	1.465
GAC	0.349	0.351	0.348	0.348	0.353	0.349
GAU	1.651	1.649	1.652	1.652	1.647	1.651
GAA	1.524	1.527	1.526	1.523	1.521	1.521
GAG	0.476	0.473	0.474	0.477	0.479	0.479
UUC	0.685	0.691	0.684	0.688	0.683	0.687
UUU	1.315	1.309	1.316	1.312	1.317	1.313
GGA	1.578	1.59	1.601	1.593	1.591	1.591
GGC	0.407	0.403	0.397	0.402	0.385	0.385
GGG	0.684	0.676	0.668	0.672	0.677	0.68
GGU	1.331	1.331	1.333	1.332	1.348	1.345
CAC	0.415	0.42	0.408	0.42	0.407	0.409
CAU	1.585	1.58	1.592	1.58	1.593	1.591
AUA	0.894	0.898	0.908	0.895	0.911	0.914
AUC	0.607	0.59	0.59	0.597	0.585	0.587
AUU	1.498	1.512	1.502	1.508	1.504	1.499
AAA	1.472	1.466	1.477	1.466	1.478	1.475
AAG	0.528	0.534	0.523	0.534	0.522	0.525
CUA	1.131	1.125	1.143	1.125	1.121	1.121
CUC	0.539	0.534	0.527	0.541	0.54	0.54
CUG	0.575	0.591	0.567	0.589	0.589	0.594
CUU	1.755	1.751	1.763	1.745	1.75	1.745
UUA	1.177	1.177	1.184	1.18	1.18	1.182
UUG	0.823	0.823	0.816	0.82	0.82	0.818
AUG	1	1	1	1	1	1
AAC	0.425	0.425	0.42	0.426	0.429	0.434
AAU	1.575	1.575	1.58	1.574	1.571	1.566
CCA	1.083	1.085	1.075	1.091	1.083	1.083
CCC	0.873	0.875	0.891	0.877	0.894	0.899
CCG	0.405	0.398	0.409	0.397	0.405	0.405
CCU	1.64	1.641	1.625	1.634	1.619	1.614
CAA	1.544	1.544	1.541	1.544	1.537	1.538
CAG	0.456	0.456	0.459	0.456	0.463	0.462
AGA	1.521	1.515	1.514	1.514	1.508	1.504
AGG	0.479	0.485	0.486	0.486	0.492	0.496
CGA	1.608	1.61	1.587	1.614	1.6	1.606
CGC	0.347	0.344	0.358	0.338	0.354	0.349
CGG	0.409	0.401	0.41	0.401	0.4	0.406
CGU	1.636	1.645	1.644	1.648	1.646	1.64
AGC	0.426	0.416	0.439	0.417	0.427	0.424
AGU	1.574	1.584	1.561	1.583	1.573	1.576
UCA	1.097	1.098	1.094	1.102	1.083	1.082
UCC	0.856	0.858	0.872	0.859	0.866	0.868
UCG	0.398	0.397	0.383	0.4	0.397	0.402
UCU	1.649	1.646	1.65	1.64	1.653	1.649
ACA	1.264	1.264	1.265	1.264	1.262	1.264
ACC	0.683	0.685	0.69	0.683	0.676	0.681
ACG	0.405	0.402	0.396	0.401	0.402	0.398
ACU	1.648	1.649	1.649	1.652	1.66	1.657
GUA	1.447	1.455	1.448	1.447	1.45	1.45
GUC	0.519	0.514	0.52	0.52	0.522	0.522
GUG	0.609	0.611	0.617	0.613	0.604	0.604
GUU	1.425	1.421	1.414	1.421	1.424	1.424
UGG	1	1	1	1	1	1
UAC	0.384	0.387	0.389	0.383	0.385	0.385
UAU	1.616	1.613	1.611	1.617	1.615	1.615

## Sheet: Luisia_amesiana
Codon	AA	ObsFreq	RSCU
UAA	*	31	1.368
UAG	*	19	0.838
UGA	*	18	0.794
GCA	A	320	1.224
GCC	A	142	0.543
GCG	A	96	0.367
GCU	A	488	1.866
UGC	C	56	0.516
UGU	C	161	1.484
GAC	D	139	0.349
GAU	D	658	1.651
GAA	E	830	1.524
GAG	E	259	0.476
UUC	F	371	0.685
UUU	F	713	1.315
GGA	G	512	1.578
GGC	G	132	0.407
GGG	G	222	0.684
GGU	G	432	1.331
CAC	H	102	0.415
CAU	H	389	1.585
AUA	I	483	0.894
AUC	I	328	0.607
AUU	I	809	1.498
AAA	K	812	1.472
AAG	K	291	0.528
CUA	L	254	1.131
CUC	L	121	0.539
CUG	L	129	0.575
CUU	L	394	1.755
UUA	L	615	1.177
UUG	L	430	0.823
AUG	M	430	1
AAC	N	197	0.425
AAU	N	730	1.575
CCA	P	206	1.083
CCC	P	166	0.873
CCG	P	77	0.405
CCU	P	312	1.64
CAA	Q	555	1.544
CAG	Q	164	0.456
AGA	R	384	1.521
AGG	R	121	0.479
CGA	R	283	1.608
CGC	R	61	0.347
CGG	R	72	0.409
CGU	R	288	1.636
AGC	S	84	0.426
AGU	S	310	1.574
UCA	S	292	1.097
UCC	S	228	0.856
UCG	S	106	0.398
UCU	S	439	1.649
ACA	T	309	1.264
ACC	T	167	0.683
ACG	T	99	0.405
ACU	T	403	1.648
GUA	V	385	1.447
GUC	V	138	0.519
GUG	V	162	0.609
GUU	V	379	1.425
UGG	W	341	1
UAC	Y	132	0.384
UAU	Y	556	1.616
			0.347
			1.866

## Sheet: Luisia_hancockii
Codon	AA	ObsFreq	RSCU
UAA	*	31	1.368
UAG	*	19	0.838
UGA	*	18	0.794
GCA	A	319	1.22
GCC	A	141	0.539
GCG	A	95	0.363
GCU	A	491	1.878
UGC	C	57	0.523
UGU	C	161	1.477
GAC	D	137	0.351
GAU	D	643	1.649
GAA	E	835	1.527
GAG	E	259	0.473
UUC	F	373	0.691
UUU	F	706	1.309
GGA	G	517	1.59
GGC	G	131	0.403
GGG	G	220	0.676
GGU	G	433	1.331
CAC	H	103	0.42
CAU	H	387	1.58
AUA	I	483	0.898
AUC	I	317	0.59
AUU	I	813	1.512
AAA	K	813	1.466
AAG	K	296	0.534
CUA	L	255	1.125
CUC	L	121	0.534
CUG	L	134	0.591
CUU	L	397	1.751
UUA	L	612	1.177
UUG	L	428	0.823
AUG	M	428	1
AAC	N	197	0.425
AAU	N	731	1.575
CCA	P	207	1.085
CCC	P	167	0.875
CCG	P	76	0.398
CCU	P	313	1.641
CAA	Q	555	1.544
CAG	Q	164	0.456
AGA	R	387	1.515
AGG	R	124	0.485
CGA	R	281	1.61
CGC	R	60	0.344
CGG	R	70	0.401
CGU	R	287	1.645
AGC	S	81	0.416
AGU	S	308	1.584
UCA	S	293	1.098
UCC	S	229	0.858
UCG	S	106	0.397
UCU	S	439	1.646
ACA	T	308	1.264
ACC	T	167	0.685
ACG	T	98	0.402
ACU	T	402	1.649
GUA	V	388	1.455
GUC	V	137	0.514
GUG	V	163	0.611
GUU	V	379	1.421
UGG	W	342	1
UAC	Y	133	0.387
UAU	Y	554	1.613
			0.344
			1.878

## Sheet: Luisia_hancockii_OR030420
Codon	AA	ObsFreq	RSCU
UAA	*	31	1.368
UAG	*	19	0.838
UGA	*	18	0.794
GCA	A	321	1.228
GCC	A	142	0.543
GCG	A	95	0.363
GCU	A	488	1.866
UGC	C	57	0.525
UGU	C	160	1.475
GAC	D	137	0.348
GAU	D	650	1.652
GAA	E	831	1.526
GAG	E	258	0.474
UUC	F	367	0.684
UUU	F	706	1.316
GGA	G	520	1.601
GGC	G	129	0.397
GGG	G	217	0.668
GGU	G	433	1.333
CAC	H	100	0.408
CAU	H	390	1.592
AUA	I	488	0.908
AUC	I	317	0.59
AUU	I	807	1.502
AAA	K	821	1.477
AAG	K	291	0.523
CUA	L	260	1.143
CUC	L	120	0.527
CUG	L	129	0.567
CUU	L	401	1.763
UUA	L	617	1.184
UUG	L	425	0.816
AUG	M	430	1
AAC	N	196	0.42
AAU	N	737	1.58
CCA	P	205	1.075
CCC	P	170	0.891
CCG	P	78	0.409
CCU	P	310	1.625
CAA	Q	558	1.541
CAG	Q	166	0.459
AGA	R	386	1.514
AGG	R	124	0.486
CGA	R	279	1.587
CGC	R	63	0.358
CGG	R	72	0.41
CGU	R	289	1.644
AGC	S	86	0.439
AGU	S	306	1.561
UCA	S	291	1.094
UCC	S	232	0.872
UCG	S	102	0.383
UCU	S	439	1.65
ACA	T	310	1.265
ACC	T	169	0.69
ACG	T	97	0.396
ACU	T	404	1.649
GUA	V	387	1.448
GUC	V	139	0.52
GUG	V	165	0.617
GUU	V	378	1.414
UGG	W	338	1
UAC	Y	133	0.389
UAU	Y	551	1.611
			0.348
			1.866

## Sheet: Luisia_morsei
Codon	AA	ObsFreq	RSCU
UAA	*	31	1.368
UAG	*	19	0.838
UGA	*	18	0.794
GCA	A	319	1.22
GCC	A	141	0.539
GCG	A	95	0.363
GCU	A	491	1.878
UGC	C	58	0.53
UGU	C	161	1.47
GAC	D	137	0.348
GAU	D	650	1.652
GAA	E	833	1.523
GAG	E	261	0.477
UUC	F	373	0.688
UUU	F	711	1.312
GGA	G	519	1.593
GGC	G	131	0.402
GGG	G	219	0.672
GGU	G	434	1.332
CAC	H	103	0.42
CAU	H	388	1.58
AUA	I	484	0.895
AUC	I	323	0.597
AUU	I	816	1.508
AAA	K	818	1.466
AAG	K	298	0.534
CUA	L	256	1.125
CUC	L	123	0.541
CUG	L	134	0.589
CUU	L	397	1.745
UUA	L	615	1.18
UUG	L	427	0.82
AUG	M	430	1
AAC	N	198	0.426
AAU	N	732	1.574
CCA	P	209	1.091
CCC	P	168	0.877
CCG	P	76	0.397
CCU	P	313	1.634
CAA	Q	556	1.544
CAG	Q	164	0.456
AGA	R	386	1.514
AGG	R	124	0.486
CGA	R	282	1.614
CGC	R	59	0.338
CGG	R	70	0.401
CGU	R	288	1.648
AGC	S	82	0.417
AGU	S	311	1.583
UCA	S	295	1.102
UCC	S	230	0.859
UCG	S	107	0.4
UCU	S	439	1.64
ACA	T	309	1.264
ACC	T	167	0.683
ACG	T	98	0.401
ACU	T	404	1.652
GUA	V	387	1.447
GUC	V	139	0.52
GUG	V	164	0.613
GUU	V	380	1.421
UGG	W	344	1
UAC	Y	132	0.383
UAU	Y	557	1.617
			0.338
			1.878

## Sheet: Luisia_thailandica
Codon	AA	ObsFreq	RSCU
UAA	*	33	1.456
UAG	*	17	0.75
UGA	*	18	0.794
GCA	A	317	1.213
GCC	A	143	0.547
GCG	A	96	0.367
GCU	A	489	1.872
UGC	C	57	0.53
UGU	C	158	1.47
GAC	D	138	0.353
GAU	D	644	1.647
GAA	E	828	1.521
GAG	E	261	0.479
UUC	F	368	0.683
UUU	F	709	1.317
GGA	G	517	1.591
GGC	G	125	0.385
GGG	G	220	0.677
GGU	G	438	1.348
CAC	H	100	0.407
CAU	H	391	1.593
AUA	I	492	0.911
AUC	I	316	0.585
AUU	I	812	1.504
AAA	K	816	1.478
AAG	K	288	0.522
CUA	L	253	1.121
CUC	L	122	0.54
CUG	L	133	0.589
CUU	L	395	1.75
UUA	L	615	1.18
UUG	L	427	0.82
AUG	M	429	1
AAC	N	201	0.429
AAU	N	736	1.571
CCA	P	206	1.083
CCC	P	170	0.894
CCG	P	77	0.405
CCU	P	308	1.619
CAA	Q	555	1.537
CAG	Q	167	0.463
AGA	R	380	1.508
AGG	R	124	0.492
CGA	R	280	1.6
CGC	R	62	0.354
CGG	R	70	0.4
CGU	R	288	1.646
AGC	S	83	0.427
AGU	S	306	1.573
UCA	S	289	1.083
UCC	S	231	0.866
UCG	S	106	0.397
UCU	S	441	1.653
ACA	T	308	1.262
ACC	T	165	0.676
ACG	T	98	0.402
ACU	T	405	1.66
GUA	V	389	1.45
GUC	V	140	0.522
GUG	V	162	0.604
GUU	V	382	1.424
UGG	W	342	1
UAC	Y	132	0.385
UAU	Y	554	1.615
			0.353
			1.872

## Sheet: Luisia_trichorhiza
Codon	AA	ObsFreq	RSCU
UAA	*	34	1.5
UAG	*	17	0.75
UGA	*	17	0.75
GCA	A	317	1.215
GCC	A	142	0.544
GCG	A	96	0.368
GCU	A	489	1.874
UGC	C	58	0.535
UGU	C	159	1.465
GAC	D	137	0.349
GAU	D	647	1.651
GAA	E	829	1.521
GAG	E	261	0.479
UUC	F	369	0.687
UUU	F	706	1.313
GGA	G	517	1.591
GGC	G	125	0.385
GGG	G	221	0.68
GGU	G	437	1.345
CAC	H	100	0.409
CAU	H	389	1.591
AUA	I	494	0.914
AUC	I	317	0.587
AUU	I	810	1.499
AAA	K	811	1.475
AAG	K	289	0.525
CUA	L	253	1.121
CUC	L	122	0.54
CUG	L	134	0.594
CUU	L	394	1.745
UUA	L	615	1.182
UUG	L	426	0.818
AUG	M	428	1
AAC	N	203	0.434
AAU	N	732	1.566
CCA	P	206	1.083
CCC	P	171	0.899
CCG	P	77	0.405
CCU	P	307	1.614
CAA	Q	553	1.538
CAG	Q	166	0.462
AGA	R	379	1.504
AGG	R	125	0.496
CGA	R	281	1.606
CGC	R	61	0.349
CGG	R	71	0.406
CGU	R	287	1.64
AGC	S	82	0.424
AGU	S	305	1.576
UCA	S	288	1.082
UCC	S	231	0.868
UCG	S	107	0.402
UCU	S	439	1.649
ACA	T	308	1.264
ACC	T	166	0.681
ACG	T	97	0.398
ACU	T	404	1.657
GUA	V	389	1.45
GUC	V	140	0.522
GUG	V	162	0.604
GUU	V	382	1.424
UGG	W	341	1
UAC	Y	132	0.385
UAU	Y	553	1.615
			0.349
			1.874
