# Supplementary material for: Comparative Analysis of Luisia (Aeridinae, Orchidaceae) Plastomes Shed Light on Plastomes Evolution and Barcodes Investigation
Source: Genes (Basel). 2023 Dec 22;15(1):20. doi: 10.3390/genes15010020 (PMC10815154; doi:10.3390/genes15010020)
Supplement: Supplementary file 1 [file genes-15-00020-s001.zip › Supplementary Table S5.xlsx]

## Sheet: Sheet1
Gene	Length	Pi
accD	1461	5	0.00342231
atpA	1521	5	0.00328731
atpB	1500	2	0.00133333
atpE	402	0	0
atpF	552	0	0
atpH	243	2	0.00823045
atpI	741	2	0.00269906
ccsA	963	7	0.00726895
cemA	687	1	0.0014556
clpP	690	4	0.0057971
infA	231	1	0.004329
matK	1566	11	0.00702427
petA	960	0	0
petB	645	4	0.00620155
petD	489	2	0.00408998
petG	111	0	0
petL	93	0	0
petN	87	0	0
psaA	2250	0	0
psaB	2202	4	0.00181653
psaC	243	0	0
psaI	108	0	0
psaJ	132	1	0.00757576
psbA	1059	2	0.00188857
psbB	1524	7	0.00459318
psbC	1419	3	0.00211416
psbD	1059	1	0.000944287
psbE	249	1	0.00401606
psbF	117	1	0.00854701
psbH	219	1	0.00456621
psbI	108	0	0
psbJ	120	1	0.00833333
psbK	183	2	0.010929
psbL	114	0	0
psbM	102	0	0
psbN	129	0	0
psbT	105	2	0.0190476
psbZ	186	0	0
rbcL	1461	2	0.00136893
rpl2	813	0	0
rpl14	336	0	0
rpl16	405	3	0.00740741
rpl20	351	2	0.00569801
rpl22	357	1	0.00280112
rpl23	279	0	0
rpl32	171	0	0
rpl33	198	0	0
rpl36	111	3	0.027027
rpoA	1020	3	0.00294118
rpoB	3210	8	0.00249221
rpoC1	2049	1	0.000488043
rpoC2	4131	12	0.00290487
rps2	708	4	0.00564972
rps3	654	2	0.0030581
rps4	603	2	0.00331675
rps7	465	0	0
rps8	393	2	0.00508906
rps11	414	2	0.00483092
rps12	369	0	0
rps14	300	1	0.00333333
rps15	273	2	0.00732601
rps16	282	0	0
rps18	303	1	0.00330033
rps19	276	0	0
ycf1	5412	63	0.0116408
ycf2	6972	13	0.0018646
ycf3	507	1	0.00197239
ycf4	648	3	0.00462963

## Sheet: Sheet2
Window	Midpoint	Pi	Theta	S
1-113	51	0.012	0.01314	3
27-138	76	0.00867	0.00876	2
52-163	113	0.00533	0.00438	1
77-188	138	0	0	0
114-213	163	0.00533	0.00438	1
139-238	188	0.00533	0.00438	1
164-263	213	0.00533	0.00438	1
189-288	238	0.00533	0.00438	1
214-313	263	0	0	0
239-338	288	0	0	0
264-363	313	0.00333	0.00438	1
289-388	338	0.00333	0.00438	1
314-413	363	0.00333	0.00438	1
339-438	388	0.00333	0.00438	1
364-463	413	0.00533	0.00438	1
389-488	438	0.00533	0.00438	1
414-513	463	0.00533	0.00438	1
439-538	488	0.00867	0.00876	2
464-563	513	0.00333	0.00438	1
489-588	538	0.00333	0.00438	1
514-613	563	0.00333	0.00438	1
539-638	588	0	0	0
564-663	613	0	0	0
589-688	638	0	0	0
614-713	663	0	0	0
639-738	688	0	0	0
664-763	713	0.00333	0.00438	1
689-788	738	0.00333	0.00438	1
714-813	763	0.00333	0.00438	1
739-838	788	0.00333	0.00438	1
764-863	813	0	0	0
789-888	838	0	0	0
814-913	863	0	0	0
839-938	888	0	0	0
864-963	913	0	0	0
889-988	938	0	0	0
914-1013	963	0.00333	0.00438	1
939-1038	988	0.00333	0.00438	1
964-1063	1013	0.00333	0.00438	1
989-1088	1038	0.00333	0.00438	1
1014-1113	1063	0	0	0
1039-1138	1088	0	0	0
1064-1163	1113	0	0	0
1089-1188	1138	0	0	0
1114-1213	1163	0	0	0
1139-1238	1188	0	0	0
1164-1263	1213	0.00533	0.00438	1
1189-1288	1238	0.01133	0.00876	2
1214-1313	1263	0.018	0.01752	4
1239-1338	1288	0.018	0.01752	4
1264-1363	1313	0.01933	0.0219	5
1289-1399	1338	0.01333	0.01752	4
1314-1424	1363	0.00667	0.00876	2
1339-1449	1399	0.00667	0.00876	2
1364-1474	1424	0	0	0
1400-1499	1449	0	0	0
1425-1524	1474	0	0	0
1450-1549	1499	0	0	0
1475-1590	1524	0	0	0
1500-1615	1549	0	0	0
1525-1640	1590	0	0	0
1550-1665	1615	0.00667	0.00876	2
1591-1690	1640	0.00667	0.00876	2
1616-1756	1665	0.01	0.01314	3
1641-1781	1690	0.01	0.01314	3
1666-1806	1756	0.00333	0.00438	1
1691-1831	1781	0.00333	0.00438	1
1757-1856	1806	0	0	0
1782-1881	1831	0.00533	0.00438	1
1807-1906	1856	0.01067	0.00876	2
1832-1931	1881	0.01067	0.00876	2
1857-1956	1906	0.01067	0.00876	2
1882-1981	1931	0.00533	0.00438	1
1907-2006	1956	0	0	0
1932-2031	1981	0	0	0
1957-2056	2006	0	0	0
1982-2081	2031	0.00333	0.00438	1
2007-2106	2056	0.00667	0.00876	2
2032-2131	2081	0.00667	0.00876	2
2057-2156	2106	0.00667	0.00876	2
2082-2181	2131	0.00333	0.00438	1
2107-2206	2156	0	0	0
2132-2231	2181	0	0	0
2157-2256	2206	0	0	0
2182-2281	2231	0	0	0
2207-2306	2256	0	0	0
2232-2331	2281	0	0	0
2257-2356	2306	0	0	0
2282-2381	2331	0.00333	0.00438	1
2307-2406	2356	0.00333	0.00438	1
2332-2431	2381	0.00333	0.00438	1
2357-2456	2406	0.00333	0.00438	1
2382-2493	2431	0	0	0
2407-2518	2456	0	0	0
2432-2543	2493	0.00333	0.00438	1
2457-2568	2518	0.00333	0.00438	1
2494-2593	2543	0.00333	0.00438	1
2519-2618	2568	0.01467	0.01314	3
2544-2643	2593	0.01133	0.00876	2
2569-2668	2618	0.01467	0.01314	3
2594-2693	2643	0.01467	0.01314	3
2619-2718	2668	0.00667	0.00876	2
2644-2743	2693	0.01267	0.01314	3
2669-2768	2718	0.00933	0.00876	2
2694-2793	2743	0.00933	0.00876	2
2719-2818	2768	0.006	0.00438	1
2744-2843	2793	0	0	0
2769-2868	2818	0	0	0
2794-2893	2843	0	0	0
2819-2918	2868	0	0	0
2844-2943	2893	0	0	0
2869-2968	2918	0	0	0
2894-2993	2943	0.006	0.00438	1
2919-3018	2968	0.02	0.01752	4
2944-3043	2993	0.02533	0.0219	5
2969-3068	3018	0.02533	0.0219	5
2994-3093	3043	0.01933	0.01752	4
3019-3118	3068	0.00533	0.00438	1
3044-3143	3093	0	0	0
3069-3168	3118	0	0	0
3094-3193	3143	0	0	0
3119-3218	3168	0	0	0
3144-3243	3193	0	0	0
3169-3268	3218	0	0	0
3194-3293	3243	0.00867	0.00876	2
3219-3318	3268	0.014	0.01314	3
3244-3343	3293	0.014	0.01314	3
3269-3368	3318	0.01933	0.01752	4
3294-3393	3343	0.014	0.01314	3
3319-3418	3368	0.01467	0.01314	3
3344-3443	3393	0.024	0.0219	5
3369-3488	3418	0.024	0.0219	5
3394-3514	3443	0.02733	0.02628	6
3419-3539	3488	0.02467	0.02628	6
3444-3564	3514	0.03867	0.03942	9
3489-3617	3539	0.04	0.0438	10
3515-3677	3564	0.03333	0.03504	8
3540-3702	3617	0.044	0.0438	10
3565-3727	3677	0.02067	0.0219	5
3618-3752	3702	0.014	0.01314	3
3678-3777	3727	0.014	0.01314	3
3703-3802	3752	0	0	0
3728-3827	3777	0	0	0
3753-3852	3802	0	0	0
3778-3877	3827	0	0	0
3803-3902	3852	0	0	0
3828-3927	3877	0.00533	0.00438	1
3853-3952	3902	0.02333	0.01752	4
3878-3977	3927	0.02667	0.0219	5
3903-4002	3952	0.02667	0.0219	5
3928-4027	3977	0.02133	0.01752	4
3953-4052	4002	0.00333	0.00438	1
3978-4077	4027	0	0	0
4003-4102	4052	0	0	0
4028-4128	4077	0	0	0
4053-4153	4102	0.00533	0.00438	1
4078-4178	4128	0.00533	0.00438	1
4103-4203	4153	0.00533	0.00438	1
4129-4228	4178	0.00533	0.00438	1
4154-4253	4203	0	0	0
4179-4278	4228	0	0	0
4204-4303	4253	0.00333	0.00438	1
4229-4328	4278	0.00667	0.00876	2
4254-4353	4303	0.05467	0.04818	11
4279-4391	4328	0.10067	0.08759	20
4304-4431	4353	0.11933	0.10073	23
4329-4456	4391	0.11933	0.10073	23
4354-4481	4431	0.07133	0.06131	14
4392-4506	4456	0.02533	0.0219	5
4432-4531	4481	0.00333	0.00438	1
4457-4556	4506	0	0	0
4482-4581	4531	0	0	0
4507-4606	4556	0	0	0
4532-4631	4581	0	0	0
4557-4657	4606	0	0	0
4582-4682	4631	0.00333	0.00438	1
4607-4707	4657	0.00867	0.00876	2
4632-4732	4682	0.00867	0.00876	2
4658-4757	4707	0.00867	0.00876	2
4683-4782	4732	0.00533	0.00438	1
4708-4807	4757	0	0	0
4733-4832	4782	0.00333	0.00438	1
4758-4878	4807	0.00867	0.00876	2
4783-4903	4832	0.00867	0.00876	2
4808-4934	4878	0.00867	0.00876	2
4833-4959	4903	0.00533	0.00438	1
4879-4985	4934	0	0	0
4904-5010	4959	0	0	0
4935-5035	4985	0	0	0
4960-5066	5010	0	0	0
4986-5091	5035	0	0	0
5011-5116	5066	0	0	0
5036-5141	5091	0.00533	0.00438	1
5067-5166	5116	0.00533	0.00438	1
5092-5191	5141	0.00533	0.00438	1
5117-5216	5166	0.00533	0.00438	1
5142-5241	5191	0	0	0
5167-5266	5216	0	0	0
5192-5291	5241	0	0	0
5217-5316	5266	0.00333	0.00438	1
5242-5341	5291	0.00333	0.00438	1
5267-5366	5316	0.00333	0.00438	1
5292-5391	5341	0.00333	0.00438	1
5317-5416	5366	0	0	0
5342-5516	5391	0.00667	0.00876	2
5367-5543	5416	0.012	0.01314	3
5392-5568	5516	0.02067	0.0219	5
5417-5593	5543	0.02067	0.0219	5
5517-5618	5568	0.014	0.01314	3
5544-5643	5593	0.00867	0.00876	2
5569-5668	5618	0	0	0
5594-5694	5643	0	0	0
5619-5719	5668	0.00333	0.00438	1
5644-5744	5694	0.00333	0.00438	1
5669-5769	5719	0.00333	0.00438	1
5695-5794	5744	0.00333	0.00438	1
5720-5819	5769	0	0	0
5745-5844	5794	0	0	0
5770-5869	5819	0	0	0
5795-5894	5844	0	0	0
5820-5919	5869	0.01	0.01314	3
5845-5947	5894	0.01	0.01314	3
5870-5972	5919	0.02933	0.03066	7
5895-6028	5947	0.038	0.03942	9
5920-6053	5972	0.028	0.02628	6
5948-6078	6028	0.028	0.02628	6
5973-6112	6053	0.014	0.01314	3
6029-6154	6078	0.00533	0.00438	1
6054-6179	6112	0.00533	0.00438	1
6079-6204	6154	0.01067	0.00876	2
6113-6229	6179	0.00533	0.00438	1
6155-6254	6204	0.00533	0.00438	1
6180-6279	6229	0.00533	0.00438	1
6205-6304	6254	0	0	0
6230-6329	6279	0	0	0
6255-6354	6304	0	0	0
6280-6379	6329	0.00333	0.00438	1
6305-6404	6354	0.00333	0.00438	1
6330-6429	6379	0.00333	0.00438	1
6355-6454	6404	0.00333	0.00438	1
6380-6479	6429	0	0	0
6405-6504	6454	0.01067	0.00876	2
6430-6545	6479	0.014	0.01314	3
6455-6570	6504	0.01733	0.01752	4
6480-6595	6545	0.01733	0.01752	4
6505-6620	6570	0.00667	0.00876	2
6546-6645	6595	0.00933	0.00876	2
6571-6670	6620	0.01133	0.00876	2
6596-6695	6645	0.01133	0.00876	2
6621-6720	6670	0.01467	0.01314	3
6646-6745	6695	0.01533	0.01752	4
6671-6770	6720	0.01	0.01314	3
6696-6795	6745	0.01	0.01314	3
6721-6831	6770	0.012	0.01314	3
6746-6856	6795	0.00533	0.00438	1
6771-6887	6831	0.012	0.01314	3
6796-6939	6856	0.03467	0.03942	9
6832-6983	6887	0.02933	0.03504	8
6857-7019	6939	0.02933	0.03504	8
6888-7044	6983	0.02267	0.02628	6
6940-7070	7019	0.00333	0.00438	1
6984-7096	7044	0.00933	0.00876	2
7020-7121	7070	0.01267	0.01314	3
7045-7146	7096	0.01267	0.01314	3
7072-7182	7121	0.00933	0.00876	2
7097-7207	7146	0.00333	0.00438	1
7122-7284	7182	0	0	0
7147-7309	7207	0.006	0.00438	1
7183-7334	7284	0.01667	0.01314	3
7208-7359	7309	0.01667	0.01314	3
7285-7384	7334	0.022	0.01752	4
7310-7409	7359	0.016	0.01314	3
7335-7434	7384	0.00867	0.00876	2
7360-7459	7409	0.01933	0.01752	4
7385-7484	7434	0.02667	0.02628	6
7410-7509	7459	0.02667	0.02628	6
7435-7573	7484	0.02867	0.02628	6
7460-7598	7509	0.018	0.01752	4
7485-7623	7573	0.00867	0.00876	2
7510-7648	7598	0.00867	0.00876	2
7574-7673	7623	0.00667	0.00876	2
7599-7699	7648	0.016	0.01752	4
7624-7724	7673	0.01267	0.01314	3
7649-7749	7699	0.016	0.01752	4
7674-7774	7724	0.01267	0.01314	3
7700-7799	7749	0.01	0.01314	3
7725-7825	7774	0.01	0.01314	3
7750-7850	7799	0.00667	0.00876	2
7775-7875	7825	0.00667	0.00876	2
7800-7900	7850	0.006	0.00438	1
7826-7925	7875	0.006	0.00438	1
7851-7950	7900	0.01133	0.00876	2
7876-7975	7925	0.01467	0.01314	3
7901-8000	7950	0.00867	0.00876	2
7926-8025	7975	0.00867	0.00876	2
7951-8050	8000	0.00667	0.00876	2
7976-8075	8025	0.00333	0.00438	1
8001-8100	8050	0.00333	0.00438	1
8026-8125	8075	0.00333	0.00438	1
8051-8150	8100	0	0	0
8076-8175	8125	0	0	0
8101-8209	8150	0.024	0.01752	4
8126-8234	8175	0.02733	0.0219	5
8151-8268	8209	0.03267	0.02628	6
8176-8293	8234	0.036	0.03066	7
8210-8318	8268	0.012	0.01314	3
8235-8349	8293	0.014	0.01314	3
8269-8374	8318	0.012	0.01314	3
8294-8402	8349	0.00867	0.00876	2
8319-8427	8374	0.00867	0.00876	2
8350-8454	8402	0.012	0.01314	3
8375-8479	8427	0.00867	0.00876	2
8403-8504	8454	0.00867	0.00876	2
8428-8529	8479	0.00867	0.00876	2
8455-8554	8504	0	0	0
8480-8579	8529	0	0	0
8505-8604	8554	0	0	0
8530-8629	8579	0	0	0
8555-8654	8604	0	0	0
8580-8679	8629	0.00867	0.00876	2
8605-8704	8654	0.00867	0.00876	2
8630-8729	8679	0.02133	0.01752	4
8655-8760	8704	0.02133	0.01752	4
8680-8785	8729	0.01267	0.00876	2
8705-8810	8760	0.01267	0.00876	2
8730-8835	8785	0.00333	0.00438	1
8761-8860	8810	0.00333	0.00438	1
8786-8885	8835	0.00333	0.00438	1
8811-8910	8860	0.00333	0.00438	1
8836-8935	8885	0	0	0
8861-8960	8910	0	0	0
8886-8985	8935	0	0	0
8911-9014	8960	0.006	0.00438	1
8936-9039	8985	0.006	0.00438	1
8961-9064	9014	0.006	0.00438	1
8986-9089	9039	0.006	0.00438	1
9015-9114	9064	0	0	0
9040-9139	9089	0	0	0
9065-9164	9114	0	0	0
9090-9189	9139	0.00733	0.00438	1
9115-9229	9164	0.00733	0.00438	1
9140-9254	9189	0.00733	0.00438	1
9165-9286	9229	0.01733	0.01752	4
9190-9325	9254	0.01867	0.0219	5
9230-9365	9286	0.02467	0.02628	6
9255-9390	9325	0.03333	0.03504	8
9287-9431	9365	0.03933	0.03504	8
9326-9473	9390	0.036	0.03066	7
9366-9515	9431	0.058	0.04818	11
9391-9540	9473	0.04933	0.03942	9
9449-9565	9515	0.04067	0.03066	7
9491-9628	9540	0.062	0.04818	11
9516-9653	9565	0.03933	0.03066	7
9541-9678	9628	0.04533	0.03504	8
9566-9748	9653	0.04333	0.03504	8
9629-9779	9678	0.026	0.0219	5
9654-9812	9748	0.02067	0.01752	4
9679-9837	9779	0.018	0.01752	4
9749-9870	9812	0.01267	0.01314	3
9780-9895	9837	0.00867	0.00876	2
9813-9929	9870	0.014	0.01314	3
9838-9960	9895	0.01067	0.00876	2
9871-9985	9929	0.01067	0.00876	2
9896-10010	9960	0.01467	0.01314	3
9930-10042	9985	0.01267	0.01314	3
9961-10067	10010	0.01267	0.01314	3
9986-10092	10042	0.01267	0.01314	3
10011-10118	10067	0.00667	0.00876	2
10043-10143	10092	0.00333	0.00438	1
10068-10168	10118	0.00933	0.00876	2
10093-10193	10143	0.00933	0.00876	2
10119-10222	10168	0.01467	0.01314	3
10144-10247	10193	0.01467	0.01314	3
10169-10272	10222	0.014	0.01314	3
10198-10297	10247	0.014	0.01314	3
10223-10322	10272	0.00533	0.00438	1
10248-10347	10297	0.00533	0.00438	1
10273-10372	10322	0.00333	0.00438	1
10298-10397	10347	0.00333	0.00438	1
10323-10423	10372	0.00933	0.00876	2
10348-10448	10397	0.00933	0.00876	2
10373-10473	10423	0.01133	0.00876	2
10398-10498	10448	0.01133	0.00876	2
10424-10523	10473	0.00533	0.00438	1
10449-10549	10498	0.00533	0.00438	1
10474-10575	10523	0	0	0
10499-10600	10549	0.006	0.00438	1
10524-10625	10575	0.006	0.00438	1
10550-10650	10600	0.006	0.00438	1
10576-10675	10625	0.01467	0.01314	3
10601-10700	10650	0.012	0.01314	3
10626-10725	10675	0.012	0.01314	3
10651-10750	10700	0.012	0.01314	3
10676-10775	10725	0.00333	0.00438	1
10701-10800	10750	0.00533	0.00438	1
10726-10825	10775	0.00533	0.00438	1
10751-10850	10800	0.00533	0.00438	1
10776-10875	10825	0.00533	0.00438	1
10801-10900	10850	0.00333	0.00438	1
10826-10925	10875	0.00333	0.00438	1
10851-10950	10900	0.00333	0.00438	1
10876-10975	10925	0.00333	0.00438	1
10901-11000	10950	0	0	0
10926-11025	10975	0	0	0
10951-11050	11000	0	0	0
10976-11075	11025	0	0	0
11001-11100	11050	0	0	0
11026-11125	11075	0.00533	0.00438	1
11051-11150	11100	0.00533	0.00438	1
11076-11183	11125	0.00867	0.00876	2
11101-11211	11150	0.026	0.02628	6
11126-11236	11183	0.02067	0.0219	5
11151-11261	11211	0.02067	0.0219	5
11184-11286	11236	0.01733	0.01752	4
11212-11311	11261	0	0	0
11237-11390	11286	0.03067	0.03066	7
11262-11415	11311	0.03067	0.03066	7
11287-11440	11390	0.03067	0.03066	7
11312-11465	11415	0.03067	0.03066	7
11391-11491	11440	0.00533	0.00438	1
11416-11516	11465	0.00533	0.00438	1
11441-11541	11491	0.00533	0.00438	1
11466-11566	11516	0.01067	0.00876	2
11492-11591	11541	0.01467	0.01314	3
11517-11616	11566	0.01467	0.01314	3
11542-11641	11591	0.01467	0.01314	3
11567-11666	11616	0.01267	0.01314	3
11592-11691	11641	0.00333	0.00438	1
11617-11716	11666	0.00333	0.00438	1
11642-11741	11691	0.00333	0.00438	1
11667-11766	11716	0	0	0
11692-11791	11741	0	0	0
11717-11816	11766	0	0	0
11742-11841	11791	0	0	0
11767-11866	11816	0	0	0
11792-11891	11841	0	0	0
11817-11916	11866	0	0	0
11842-11941	11891	0	0	0
11867-11966	11916	0	0	0
11892-11991	11941	0	0	0
11917-12016	11966	0	0	0
11942-12041	11991	0	0	0
11967-12066	12016	0	0	0
11992-12091	12041	0	0	0
12017-12116	12066	0	0	0
12042-12141	12091	0	0	0
12067-12166	12116	0	0	0
12092-12191	12141	0.00333	0.00438	1
12117-12216	12166	0.00333	0.00438	1
12142-12241	12191	0.00333	0.00438	1
12167-12266	12216	0.00333	0.00438	1
12192-12291	12241	0	0	0
12217-12316	12266	0	0	0
12242-12341	12291	0.00667	0.00876	2
12267-12366	12316	0.00667	0.00876	2
12292-12391	12341	0.00667	0.00876	2
12317-12416	12366	0.00667	0.00876	2
12342-12441	12391	0	0	0
12367-12466	12416	0	0	0
12392-12491	12441	0.00333	0.00438	1
12417-12516	12466	0.00333	0.00438	1
12442-12541	12491	0.00333	0.00438	1
12467-12566	12516	0.00333	0.00438	1
12492-12591	12541	0	0	0
12517-12616	12566	0.00333	0.00438	1
12542-12641	12591	0.00333	0.00438	1
12567-12666	12616	0.00333	0.00438	1
12592-12691	12641	0.00333	0.00438	1
12617-12716	12666	0.00533	0.00438	1
12642-12741	12691	0.01467	0.01314	3
12667-12766	12716	0.01467	0.01314	3
12692-12791	12741	0.01467	0.01314	3
12717-12816	12766	0.00933	0.00876	2
12742-12841	12791	0	0	0
12767-12866	12816	0	0	0
12792-12891	12841	0.00333	0.00438	1
12817-12916	12866	0.00667	0.00876	2
12842-12941	12891	0.01533	0.01752	4
12867-12966	12916	0.01533	0.01752	4
12892-12991	12941	0.012	0.01314	3
12917-13016	12966	0.012	0.01314	3
12942-13043	12991	0.00333	0.00438	1
12967-13068	13016	0.00333	0.00438	1
12992-13116	13043	0.00333	0.00438	1
13017-13141	13068	0	0	0
13044-13166	13116	0	0	0
13069-13191	13141	0	0	0
13117-13216	13166	0	0	0
13142-13241	13191	0	0	0
13167-13266	13216	0	0	0
13192-13291	13241	0	0	0
13217-13316	13266	0	0	0
13242-13341	13291	0.00333	0.00438	1
13267-13366	13316	0.00333	0.00438	1
13292-13391	13341	0.00333	0.00438	1
13317-13416	13366	0.00333	0.00438	1
13342-13441	13391	0	0	0
13367-13466	13416	0	0	0
13392-13491	13441	0.00333	0.00438	1
13417-13516	13466	0.00333	0.00438	1
13442-13541	13491	0.00333	0.00438	1
13467-13566	13516	0.00867	0.00876	2
13492-13591	13541	0.00533	0.00438	1
13517-13616	13566	0.00867	0.00876	2
13542-13641	13591	0.00867	0.00876	2
13567-13666	13616	0.00333	0.00438	1
13592-13691	13641	0.00333	0.00438	1
13617-13725	13666	0	0	0
13642-13750	13691	0	0	0
13667-13775	13725	0	0	0
13692-13800	13750	0.00333	0.00438	1
13726-13825	13775	0.00667	0.00876	2
13751-13850	13800	0.00667	0.00876	2
13776-13875	13825	0.02333	0.03066	7
13801-13926	13850	0.02	0.02628	6
13826-13951	13875	0.01667	0.0219	5
13851-13976	13926	0.02333	0.03066	7
13876-14001	13951	0.00667	0.00876	2
13927-14044	13976	0.01333	0.01752	4
13952-14069	14001	0.01333	0.01752	4
13977-14104	14044	0.00667	0.00876	2
14002-14129	14069	0.00667	0.00876	2
14045-14154	14104	0	0	0
14070-14179	14129	0	0	0
14105-14204	14154	0	0	0
14130-14229	14179	0	0	0
14155-14254	14204	0.00533	0.00438	1
14180-14279	14229	0.00533	0.00438	1
14205-14304	14254	0.00533	0.00438	1
14230-14329	14279	0.01067	0.00876	2
14255-14354	14304	0.00533	0.00438	1
14280-14379	14329	0.00533	0.00438	1
14305-14404	14354	0.00533	0.00438	1
14330-14429	14379	0.00667	0.00876	2
14355-14454	14404	0.00667	0.00876	2
14380-14479	14429	0.00667	0.00876	2
14405-14504	14454	0.01	0.01314	3
14430-14529	14479	0.00333	0.00438	1
14455-14554	14504	0.00333	0.00438	1
14480-14579	14529	0.00333	0.00438	1
14505-14604	14554	0	0	0
14530-14629	14579	0	0	0
14555-14654	14604	0	0	0
14580-14679	14629	0	0	0
14605-14704	14654	0	0	0
14630-14737	14679	0	0	0
14655-14772	14704	0	0	0
14680-14803	14737	0.01667	0.01314	3
14705-14828	14772	0.02	0.01752	4
14738-14853	14803	0.02	0.01752	4
14773-14878	14828	0.026	0.0219	5
14804-14903	14853	0.00933	0.00876	2
14829-14928	14878	0.006	0.00438	1
14854-14953	14903	0.006	0.00438	1
14879-14978	14928	0	0	0
14904-15003	14953	0.00533	0.00438	1
14929-15028	14978	0.00533	0.00438	1
14954-15053	15003	0.00533	0.00438	1
14979-15078	15028	0.00533	0.00438	1
15004-15103	15053	0	0	0
15029-15128	15078	0.00533	0.00438	1
15054-15154	15103	0.00533	0.00438	1
15079-15179	15128	0.00533	0.00438	1
15104-15204	15154	0.01067	0.00876	2
15129-15229	15179	0.00867	0.00876	2
15155-15254	15204	0.01733	0.01752	4
15180-15279	15229	0.01733	0.01752	4
15205-15304	15254	0.01867	0.0219	5
15230-15329	15279	0.01533	0.01752	4
15255-15354	15304	0.00667	0.00876	2
15280-15379	15329	0.01	0.01314	3
15305-15404	15354	0.00333	0.00438	1
15330-15429	15379	0.00333	0.00438	1
15355-15454	15404	0.00333	0.00438	1
15380-15480	15429	0	0	0
15405-15505	15454	0.00667	0.00876	2
15430-15530	15480	0.00667	0.00876	2
15455-15556	15505	0.01267	0.01314	3
15481-15581	15530	0.02467	0.0219	5
15506-15606	15556	0.018	0.01314	3
15531-15631	15581	0.02333	0.01752	4
15557-15656	15606	0.01733	0.01314	3
15582-15681	15631	0.00533	0.00438	1
15607-15706	15656	0.012	0.01314	3
15632-15731	15681	0.00667	0.00876	2
15657-15756	15706	0.00667	0.00876	2
15682-15781	15731	0.00667	0.00876	2
15707-15806	15756	0	0	0
15732-15831	15781	0	0	0
15757-15856	15806	0	0	0
15782-15881	15831	0	0	0
15807-15906	15856	0.00533	0.00438	1
15832-15931	15881	0.00533	0.00438	1
15857-15956	15906	0.00533	0.00438	1
15882-15981	15931	0.00533	0.00438	1
15907-16006	15956	0	0	0
15932-16031	15981	0	0	0
15957-16056	16006	0	0	0
15982-16081	16031	0	0	0
16007-16106	16056	0	0	0
16032-16131	16081	0	0	0
16057-16156	16106	0	0	0
16082-16181	16131	0	0	0
16107-16206	16156	0	0	0
16132-16231	16181	0	0	0
16157-16256	16206	0	0	0
16182-16281	16231	0.00333	0.00438	1
16207-16306	16256	0.00333	0.00438	1
16232-16331	16281	0.00667	0.00876	2
16257-16356	16306	0.00667	0.00876	2
16282-16381	16331	0.00333	0.00438	1
16307-16406	16356	0.00333	0.00438	1
16332-16431	16381	0	0	0
16357-16456	16406	0	0	0
16382-16481	16431	0.00533	0.00438	1
16407-16506	16456	0.00533	0.00438	1
16432-16531	16481	0.00533	0.00438	1
16457-16567	16506	0.00533	0.00438	1
16482-16592	16531	0.00533	0.00438	1
16507-16617	16567	0.00533	0.00438	1
16532-16642	16592	0.00533	0.00438	1
16568-16668	16617	0.00533	0.00438	1
16593-16693	16642	0	0	0
16618-16718	16668	0	0	0
16643-16743	16693	0	0	0
16669-16768	16718	0.00533	0.00438	1
16694-16793	16743	0.00533	0.00438	1
16719-16818	16768	0.01067	0.00876	2
16744-16843	16793	0.01067	0.00876	2
16769-16868	16818	0.00533	0.00438	1
16794-16893	16843	0.01067	0.00876	2
16819-16918	16868	0.00533	0.00438	1
16844-16943	16893	0.00533	0.00438	1
16869-16968	16918	0.00533	0.00438	1
16894-16993	16943	0	0	0
16919-17018	16968	0	0	0
16944-17043	16993	0.00533	0.00438	1
16969-17068	17018	0.00533	0.00438	1
16994-17093	17043	0.01067	0.00876	2
17019-17118	17068	0.01067	0.00876	2
17044-17143	17093	0.00533	0.00438	1
17069-17168	17118	0.00533	0.00438	1
17094-17193	17143	0	0	0
17119-17218	17168	0	0	0
17144-17243	17193	0	0	0
17169-17268	17218	0	0	0
17194-17293	17243	0	0	0
17219-17318	17268	0	0	0
17244-17343	17293	0.00333	0.00438	1
17269-17368	17318	0.00333	0.00438	1
17294-17393	17343	0.00333	0.00438	1
17319-17418	17368	0.00333	0.00438	1
17344-17443	17393	0	0	0
17369-17468	17418	0	0	0
17394-17493	17443	0	0	0
17419-17523	17468	0	0	0
17444-17548	17493	0.00333	0.00438	1
17469-17573	17523	0.00333	0.00438	1
17494-17598	17548	0.00333	0.00438	1
17524-17623	17573	0.00667	0.00876	2
17549-17655	17598	0.00333	0.00438	1
17574-17680	17623	0.00333	0.00438	1
17599-17712	17655	0.00667	0.00876	2
17624-17737	17680	0.00333	0.00438	1
17656-17762	17712	0.00667	0.00876	2
17681-17787	17737	0.00667	0.00876	2
17713-17812	17762	0.00667	0.00876	2
17738-17837	17787	0.012	0.01314	3
17763-17862	17812	0.00867	0.00876	2
17788-17887	17837	0.00867	0.00876	2
17813-17912	17862	0.00533	0.00438	1
17838-17937	17887	0	0	0
17863-17962	17912	0	0	0
17888-17987	17937	0	0	0
17913-18012	17962	0	0	0
17938-18037	17987	0	0	0
17963-18062	18012	0	0	0
17988-18087	18037	0	0	0
18013-18112	18062	0	0	0
18038-18137	18087	0	0	0
18063-18162	18112	0	0	0
18088-18187	18137	0	0	0
18113-18212	18162	0	0	0
18138-18237	18187	0	0	0
18163-18262	18212	0	0	0
18188-18287	18237	0	0	0
18213-18312	18262	0.00533	0.00438	1
18238-18337	18287	0.00533	0.00438	1
18263-18362	18312	0.00533	0.00438	1
18288-18387	18337	0.00533	0.00438	1
18313-18412	18362	0	0	0
18338-18437	18387	0	0	0
18363-18462	18412	0	0	0
18388-18487	18437	0	0	0
18413-18512	18462	0.00533	0.00438	1
18438-18537	18487	0.01067	0.00876	2
18463-18562	18512	0.01067	0.00876	2
18488-18587	18537	0.014	0.01314	3
18513-18612	18562	0.00867	0.00876	2
18538-18637	18587	0.00333	0.00438	1
18563-18662	18612	0.00333	0.00438	1
18588-18687	18637	0	0	0
18613-18712	18662	0.00533	0.00438	1
18638-18737	18687	0.00533	0.00438	1
18663-18762	18712	0.00867	0.00876	2
18688-18787	18737	0.00867	0.00876	2
18713-18812	18762	0.00333	0.00438	1
18738-18837	18787	0.00333	0.00438	1
18763-18862	18812	0	0	0
18788-18887	18837	0.00533	0.00438	1
18813-18912	18862	0.00533	0.00438	1
18838-18937	18887	0.00533	0.00438	1
18863-18962	18912	0.00533	0.00438	1
18888-18987	18937	0	0	0
18913-19012	18962	0	0	0
18938-19037	18987	0	0	0
18963-19062	19012	0.00333	0.00438	1
18988-19087	19037	0.00667	0.00876	2
19013-19112	19062	0.01	0.01314	3
19038-19137	19087	0.01333	0.01752	4
19063-19162	19112	0.01	0.01314	3
19088-19187	19137	0.012	0.01314	3
19113-19212	19162	0.00867	0.00876	2
19138-19237	19187	0.00533	0.00438	1
19163-19262	19212	0.01467	0.01314	3
19188-19287	19237	0.00933	0.00876	2
19213-19312	19262	0.00933	0.00876	2
19238-19337	19287	0.00933	0.00876	2
19263-19362	19312	0	0	0
19288-19387	19337	0	0	0
19313-19412	19362	0	0	0
19338-19437	19387	0	0	0
19363-19462	19412	0	0	0
19388-19487	19437	0	0	0
19413-19512	19462	0	0	0
19438-19537	19487	0	0	0
19463-19562	19512	0.00533	0.00438	1
19488-19587	19537	0.00533	0.00438	1
19513-19612	19562	0.00533	0.00438	1
19538-19637	19587	0.00533	0.00438	1
19563-19662	19612	0	0	0
19588-19687	19637	0	0	0
19613-19712	19662	0	0	0
19638-19737	19687	0	0	0
19663-19762	19712	0	0	0
19688-19787	19737	0	0	0
19713-19812	19762	0	0	0
19738-19837	19787	0	0	0
19763-19862	19812	0	0	0
19788-19887	19837	0.00667	0.00876	2
19813-19912	19862	0.00667	0.00876	2
19838-19937	19887	0.01	0.01314	3
19863-19962	19912	0.01	0.01314	3
19888-19987	19937	0.00333	0.00438	1
19913-20012	19962	0.00333	0.00438	1
19938-20037	19987	0	0	0
19963-20062	20012	0	0	0
19988-20087	20037	0	0	0
20013-20112	20062	0	0	0
20038-20137	20087	0	0	0
20063-20162	20112	0	0	0
20088-20187	20137	0	0	0
20113-20212	20162	0	0	0
20138-20237	20187	0	0	0
20163-20262	20212	0	0	0
20188-20287	20237	0	0	0
20213-20312	20262	0	0	0
20238-20337	20287	0.00533	0.00438	1
20263-20362	20312	0.00533	0.00438	1
20288-20387	20337	0.01067	0.00876	2
20313-20412	20362	0.01067	0.00876	2
20338-20437	20387	0.00533	0.00438	1
20363-20462	20412	0.00533	0.00438	1
20388-20487	20437	0	0	0
20413-20512	20462	0	0	0
20438-20537	20487	0.00333	0.00438	1
20463-20562	20512	0.00333	0.00438	1
20488-20587	20537	0.00333	0.00438	1
20513-20612	20562	0.00333	0.00438	1
20538-20637	20587	0	0	0
20563-20662	20612	0	0	0
20588-20687	20637	0	0	0
20613-20712	20662	0	0	0
20638-20737	20687	0	0	0
20663-20762	20712	0	0	0
20688-20787	20737	0	0	0
20713-20812	20762	0	0	0
20738-20837	20787	0	0	0
20763-20862	20812	0	0	0
20788-20887	20837	0	0	0
20813-20912	20862	0	0	0
20838-20937	20887	0	0	0
20863-20962	20912	0	0	0
20888-20987	20937	0	0	0
20913-21012	20962	0	0	0
20938-21037	20987	0	0	0
20963-21062	21012	0	0	0
20988-21087	21037	0	0	0
21013-21112	21062	0	0	0
21038-21137	21087	0.00333	0.00438	1
21063-21162	21112	0.00333	0.00438	1
21088-21187	21137	0.00333	0.00438	1
21113-21212	21162	0.00867	0.00876	2
21138-21237	21187	0.00533	0.00438	1
21163-21262	21212	0.00533	0.00438	1
21188-21287	21237	0.00533	0.00438	1
21213-21312	21262	0	0	0
21238-21337	21287	0	0	0
21263-21362	21312	0	0	0
21288-21387	21337	0	0	0
21313-21412	21362	0	0	0
21338-21437	21387	0	0	0
21363-21462	21412	0.00333	0.00438	1
21388-21487	21437	0.00333	0.00438	1
21413-21512	21462	0.00333	0.00438	1
21438-21537	21487	0.00333	0.00438	1
21463-21562	21512	0	0	0
21488-21587	21537	0	0	0
21513-21612	21562	0	0	0
21538-21637	21587	0	0	0
21563-21662	21612	0	0	0
21588-21687	21637	0	0	0
21613-21712	21662	0	0	0
21638-21737	21687	0	0	0
21663-21762	21712	0	0	0
21688-21787	21737	0	0	0
21713-21812	21762	0	0	0
21738-21837	21787	0	0	0
21763-21862	21812	0	0	0
21788-21887	21837	0	0	0
21813-21912	21862	0	0	0
21838-21937	21887	0.00533	0.00438	1
21863-21962	21912	0.00533	0.00438	1
21888-21987	21937	0.01467	0.01314	3
21913-22012	21962	0.018	0.01752	4
21938-22037	21987	0.01267	0.01314	3
21963-22062	22012	0.01267	0.01314	3
21988-22087	22037	0.00333	0.00438	1
22013-22112	22062	0	0	0
22038-22137	22087	0	0	0
22063-22162	22112	0.00533	0.00438	1
22088-22187	22137	0.00533	0.00438	1
22113-22212	22162	0.00533	0.00438	1
22138-22237	22187	0.00533	0.00438	1
22163-22262	22212	0	0	0
22188-22287	22237	0.00333	0.00438	1
22213-22312	22262	0.00333	0.00438	1
22238-22337	22287	0.00667	0.00876	2
22263-22362	22312	0.00667	0.00876	2
22288-22387	22337	0.00333	0.00438	1
22313-22412	22362	0.00333	0.00438	1
22338-22437	22387	0.00333	0.00438	1
22363-22462	22412	0.00333	0.00438	1
22388-22487	22437	0.00333	0.00438	1
22413-22512	22462	0.00333	0.00438	1
22438-22537	22487	0	0	0
22463-22562	22512	0	0	0
22488-22587	22537	0	0	0
22513-22612	22562	0	0	0
22538-22637	22587	0	0	0
22563-22662	22612	0	0	0
22588-22687	22637	0	0	0
22613-22712	22662	0	0	0
22638-22737	22687	0	0	0
22663-22762	22712	0	0	0
22688-22787	22737	0	0	0
22713-22812	22762	0	0	0
22738-22837	22787	0	0	0
22763-22862	22812	0	0	0
22788-22887	22837	0	0	0
22813-22912	22862	0	0	0
22838-22937	22887	0	0	0
22863-22962	22912	0	0	0
22888-22987	22937	0	0	0
22913-23012	22962	0	0	0
22938-23037	22987	0	0	0
22963-23062	23012	0	0	0
22988-23087	23037	0	0	0
23013-23112	23062	0	0	0
23038-23137	23087	0	0	0
23063-23162	23112	0	0	0
23088-23187	23137	0	0	0
23113-23212	23162	0	0	0
23138-23237	23187	0	0	0
23163-23262	23212	0	0	0
23188-23287	23237	0	0	0
23213-23312	23262	0	0	0
23238-23337	23287	0	0	0
23263-23362	23312	0	0	0
23288-23387	23337	0	0	0
23313-23412	23362	0	0	0
23338-23437	23387	0	0	0
23363-23462	23412	0	0	0
23388-23487	23437	0	0	0
23413-23512	23462	0	0	0
23438-23537	23487	0.00333	0.00438	1
23463-23562	23512	0.00333	0.00438	1
23488-23587	23537	0.00333	0.00438	1
23513-23612	23562	0.00333	0.00438	1
23538-23637	23587	0	0	0
23563-23662	23612	0	0	0
23588-23689	23637	0	0	0
23613-23714	23662	0	0	0
23638-23740	23689	0	0	0
23663-23765	23714	0	0	0
23690-23790	23740	0	0	0
23715-23815	23765	0	0	0
23741-23840	23790	0	0	0
23766-23865	23815	0	0	0
23791-23890	23840	0	0	0
23816-23931	23865	0	0	0
23841-23956	23890	0	0	0
23866-23981	23931	0.02067	0.01752	4
23891-24006	23956	0.02067	0.01752	4
23932-24031	23981	0.024	0.0219	5
23957-24056	24006	0.024	0.0219	5
23982-24081	24031	0.00867	0.00876	2
24007-24106	24056	0.00867	0.00876	2
24032-24131	24081	0.01067	0.00876	2
24057-24156	24106	0.016	0.01314	3
24082-24182	24131	0.01067	0.00876	2
24107-24207	24156	0.01067	0.00876	2
24132-24232	24182	0.00533	0.00438	1
24157-24257	24207	0.00533	0.00438	1
24183-24282	24232	0.00533	0.00438	1
24208-24307	24257	0.00533	0.00438	1
24233-24332	24282	0.00533	0.00438	1
24258-24357	24307	0	0	0
24283-24382	24332	0	0	0
24308-24407	24357	0	0	0
24333-24432	24382	0	0	0
24358-24457	24407	0	0	0
24383-24482	24432	0	0	0
24408-24507	24457	0	0	0
24433-24532	24482	0.00333	0.00438	1
24458-24557	24507	0.00333	0.00438	1
24483-24582	24532	0.00667	0.00876	2
24508-24607	24557	0.00667	0.00876	2
24533-24632	24582	0.00333	0.00438	1
24558-24657	24607	0.00333	0.00438	1
24583-24682	24632	0	0	0
24608-24707	24657	0	0	0
24633-24732	24682	0	0	0
24658-24757	24707	0	0	0
24683-24782	24732	0	0	0
24708-24807	24757	0	0	0
24733-24832	24782	0	0	0
24758-24857	24807	0	0	0
24783-24882	24832	0.00667	0.00876	2
24808-24907	24857	0.00667	0.00876	2
24833-24932	24882	0.00667	0.00876	2
24858-24957	24907	0.00667	0.00876	2
24883-24982	24932	0	0	0
24908-25007	24957	0	0	0
24933-25032	24982	0	0	0
24958-25057	25007	0	0	0
24983-25082	25032	0	0	0
25008-25107	25057	0	0	0
25033-25132	25082	0.00333	0.00438	1
25058-25157	25107	0.00333	0.00438	1
25083-25182	25132	0.00333	0.00438	1
25108-25207	25157	0.00333	0.00438	1
25133-25232	25182	0	0	0
25158-25257	25207	0	0	0
25183-25282	25232	0	0	0
25208-25307	25257	0	0	0
25233-25332	25282	0	0	0
25258-25357	25307	0	0	0
25283-25382	25332	0	0	0
25308-25407	25357	0	0	0
25333-25432	25382	0	0	0
25358-25457	25407	0	0	0
25383-25482	25432	0	0	0
25408-25507	25457	0	0	0
25433-25532	25482	0.00533	0.00438	1
25458-25557	25507	0.00533	0.00438	1
25483-25582	25532	0.00533	0.00438	1
25508-25607	25557	0.00533	0.00438	1
25533-25632	25582	0	0	0
25558-25657	25607	0	0	0
25583-25682	25632	0	0	0
25608-25707	25657	0	0	0
25633-25732	25682	0	0	0
25658-25757	25707	0	0	0
25683-25782	25732	0	0	0
25708-25807	25757	0	0	0
25733-25832	25782	0	0	0
25758-25857	25807	0	0	0
25783-25882	25832	0	0	0
25808-25907	25857	0	0	0
25833-25932	25882	0	0	0
25858-25957	25907	0.00533	0.00438	1
25883-25982	25932	0.00867	0.00876	2
25908-26007	25957	0.00867	0.00876	2
25933-26032	25982	0.00867	0.00876	2
25958-26057	26007	0.00333	0.00438	1
25983-26082	26032	0	0	0
26008-26107	26057	0	0	0
26033-26132	26082	0	0	0
26058-26157	26107	0	0	0
26083-26182	26132	0	0	0
26108-26207	26157	0	0	0
26133-26232	26182	0	0	0
26158-26257	26207	0	0	0
26183-26282	26232	0	0	0
26208-26307	26257	0	0	0
26233-26332	26282	0.00533	0.00438	1
26258-26357	26307	0.00533	0.00438	1
26283-26382	26332	0.00533	0.00438	1
26308-26407	26357	0.00533	0.00438	1
26333-26432	26382	0	0	0
26358-26457	26407	0	0	0
26383-26482	26432	0	0	0
26408-26507	26457	0.006	0.00438	1
26433-26532	26482	0.006	0.00438	1
26458-26557	26507	0.006	0.00438	1
26483-26582	26532	0.006	0.00438	1
26508-26607	26557	0	0	0
26533-26632	26582	0.00667	0.00876	2
26558-26657	26607	0.00667	0.00876	2
26583-26682	26632	0.00667	0.00876	2
26608-26707	26657	0.01	0.01314	3
26633-26732	26682	0.00333	0.00438	1
26658-26757	26707	0.00333	0.00438	1
26683-26782	26732	0.00333	0.00438	1
26708-26807	26757	0.00533	0.00438	1
26733-26832	26782	0.00533	0.00438	1
26758-26857	26807	0.00533	0.00438	1
26783-26882	26832	0.00533	0.00438	1
26808-26907	26857	0	0	0
26833-26932	26882	0	0	0
26858-26957	26907	0	0	0
26883-26982	26932	0	0	0
26908-27007	26957	0	0	0
26933-27032	26982	0	0	0
26958-27057	27007	0	0	0
26983-27082	27032	0	0	0
27008-27107	27057	0	0	0
27033-27132	27082	0	0	0
27058-27157	27107	0	0	0
27083-27182	27132	0	0	0
27108-27207	27157	0.00333	0.00438	1
27133-27232	27182	0.00333	0.00438	1
27158-27257	27207	0.00333	0.00438	1
27183-27282	27232	0.00867	0.00876	2
27208-27307	27257	0.00533	0.00438	1
27233-27332	27282	0.00533	0.00438	1
27258-27357	27307	0.00533	0.00438	1
27283-27382	27332	0	0	0
27308-27407	27357	0	0	0
27333-27432	27382	0	0	0
27358-27457	27407	0	0	0
27383-27482	27432	0	0	0
27408-27507	27457	0	0	0
27433-27532	27482	0	0	0
27458-27557	27507	0.00533	0.00438	1
27483-27582	27532	0.00533	0.00438	1
27508-27607	27557	0.00533	0.00438	1
27533-27632	27582	0.01133	0.00876	2
27558-27657	27607	0.006	0.00438	1
27583-27682	27632	0.006	0.00438	1
27608-27707	27657	0.00933	0.00876	2
27633-27732	27682	0.00333	0.00438	1
27658-27757	27707	0.00333	0.00438	1
27683-27782	27732	0.00667	0.00876	2
27708-27807	27757	0.00333	0.00438	1
27733-27832	27782	0.00333	0.00438	1
27758-27857	27807	0.00333	0.00438	1
27783-27882	27832	0	0	0
27808-27907	27857	0	0	0
27833-27932	27882	0	0	0
27858-27957	27907	0	0	0
27883-27982	27932	0	0	0
27908-28007	27957	0	0	0
27933-28032	27982	0	0	0
27958-28057	28007	0	0	0
27983-28082	28032	0.00333	0.00438	1
28008-28107	28057	0.00333	0.00438	1
28033-28132	28082	0.00333	0.00438	1
28058-28157	28107	0.00333	0.00438	1
28083-28182	28132	0	0	0
28108-28207	28157	0	0	0
28133-28232	28182	0	0	0
28158-28257	28207	0	0	0
28183-28282	28232	0.00333	0.00438	1
28208-28307	28257	0.00333	0.00438	1
28233-28332	28282	0.00667	0.00876	2
28258-28357	28307	0.01267	0.01314	3
28283-28382	28332	0.00933	0.00876	2
28308-28407	28357	0.00933	0.00876	2
28333-28432	28382	0.006	0.00438	1
28358-28532	28407	0.00333	0.00438	1
28383-28557	28432	0.00333	0.00438	1
28408-28582	28532	0.00867	0.00876	2
28433-28607	28557	0.00867	0.00876	2
28533-28632	28582	0.01133	0.00876	2
28558-28657	28607	0.018	0.01752	4
28583-28682	28632	0.016	0.01752	4
28608-28707	28657	0.038	0.03504	8
28633-28732	28682	0.032	0.03066	7
28658-28757	28707	0.02533	0.0219	5
28683-28782	28732	0.028	0.0219	5
28708-28807	28757	0.006	0.00438	1
28733-28832	28782	0.006	0.00438	1
28758-28858	28807	0.006	0.00438	1
28783-28883	28832	0	0	0
28808-28908	28858	0	0	0
28833-28939	28883	0	0	0
28859-28964	28908	0.00333	0.00438	1
28884-28996	28939	0.00333	0.00438	1
28909-29021	28964	0.00333	0.00438	1
28940-29046	28996	0.00333	0.00438	1
28965-29071	29021	0	0	0
28997-29096	29046	0.00333	0.00438	1
29022-29121	29071	0.00333	0.00438	1
29047-29146	29096	0.00333	0.00438	1
29072-29171	29121	0.014	0.01314	3
29097-29196	29146	0.01067	0.00876	2
29122-29221	29171	0.014	0.01314	3
29147-29246	29196	0.01733	0.01752	4
29172-29271	29221	0.02333	0.03066	7
29197-29296	29246	0.02333	0.03066	7
29222-29321	29271	0.02	0.02628	6
29247-29346	29296	0.02533	0.03066	7
29272-29372	29321	0.00867	0.00876	2
29297-29397	29346	0.01467	0.01314	3
29322-29422	29372	0.018	0.01752	4
29347-29447	29397	0.00933	0.00876	2
29373-29472	29422	0.00933	0.00876	2
29398-29634	29447	0.00333	0.00438	1
29423-29668	29472	0.00333	0.00438	1
29448-29693	29634	0.00867	0.00876	2
29473-29718	29668	0.00867	0.00876	2
29635-29743	29693	0.00867	0.00876	2
29669-29768	29718	0.00533	0.00438	1
29694-29793	29743	0	0	0
29719-29818	29768	0.00533	0.00438	1
29744-29843	29793	0.00867	0.00876	2
29769-29868	29818	0.01733	0.01752	4
29794-29893	29843	0.01733	0.01752	4
29819-29918	29868	0.01733	0.01752	4
29844-29949	29893	0.014	0.01314	3
29869-30248	29918	0.00533	0.00438	1
29894-30273	29949	0.00533	0.00438	1
29925-30298	30248	0	0	0
29950-30323	30273	0	0	0
30249-30348	30298	0.01	0.01314	3
30274-30373	30323	0.01	0.01314	3
30299-30398	30348	0.01	0.01314	3
30324-30425	30373	0.01333	0.01752	4
30349-30450	30398	0.00333	0.00438	1
30374-30475	30425	0.00333	0.00438	1
30399-30500	30450	0.00333	0.00438	1
30426-30525	30475	0	0	0
30451-30550	30500	0	0	0
30476-30575	30525	0	0	0
30501-30605	30550	0	0	0
30526-30631	30575	0.00333	0.00438	1
30551-30656	30605	0.00333	0.00438	1
30576-30681	30631	0.00333	0.00438	1
30606-30706	30656	0.00333	0.00438	1
30632-30731	30681	0.006	0.00438	1
30657-30756	30706	0.01133	0.00876	2
30682-30781	30731	0.01133	0.00876	2
30707-30806	30756	0.01133	0.00876	2
30732-30846	30781	0.018	0.01314	3
30757-30871	30806	0.016	0.01314	3
30782-30896	30846	0.02267	0.0219	5
30807-30928	30871	0.02267	0.0219	5
30847-30968	30896	0.01	0.01314	3
30872-30993	30928	0.01533	0.01752	4
30897-31033	30968	0.00867	0.00876	2
30944-31545	30993	0.03	0.02628	6
30969-31578	31033	0.03	0.02628	6
30994-31603	31545	0.02133	0.01752	4
31034-31628	31578	0.02133	0.01752	4
31546-31658	31603	0	0	0
31579-31683	31628	0	0	0
31604-31708	31658	0.012	0.00876	2
31629-31733	31683	0.012	0.00876	2
31659-31758	31708	0.012	0.00876	2
31684-31783	31733	0.012	0.00876	2
31709-31808	31758	0.00533	0.00438	1
31734-31833	31783	0.00533	0.00438	1
31759-31858	31808	0.00533	0.00438	1
31784-31883	31833	0.00533	0.00438	1
31809-31908	31858	0	0	0
31834-31933	31883	0	0	0
31859-31958	31908	0.00333	0.00438	1
31884-31983	31933	0.00333	0.00438	1
31909-32008	31958	0.00333	0.00438	1
31934-32033	31983	0.00333	0.00438	1
31959-32058	32008	0	0	0
31984-32093	32033	0	0	0
32009-32119	32058	0.012	0.01314	3
32034-32144	32093	0.012	0.01314	3
32059-32179	32119	0.012	0.01314	3
32094-32204	32144	0.012	0.01314	3
32120-32229	32179	0	0	0
32145-32256	32204	0	0	0
32180-32281	32229	0	0	0
32205-32306	32256	0.00333	0.00438	1
32230-32337	32281	0.00333	0.00438	1
32257-32362	32306	0.00333	0.00438	1
32282-32393	32337	0.00333	0.00438	1
32307-32426	32362	0.00867	0.00876	2
32338-32451	32393	0.014	0.01314	3
32363-32488	32426	0.02	0.01752	4
32394-32513	32451	0.02	0.01752	4
32427-32538	32488	0.01667	0.01314	3
32452-32563	32513	0.01133	0.00876	2
32489-32588	32538	0.00533	0.00438	1
32514-32613	32563	0.00533	0.00438	1
32539-32638	32588	0	0	0
32564-32663	32613	0	0	0
32589-32688	32638	0	0	0
32614-32713	32663	0.00533	0.00438	1
32639-32738	32688	0.01133	0.00876	2
32664-32763	32713	0.01133	0.00876	2
32689-32788	32738	0.01133	0.00876	2
32714-32813	32763	0.00933	0.00876	2
32739-32838	32788	0.00667	0.00876	2
32764-32863	32813	0.00667	0.00876	2
32789-32888	32838	0.00667	0.00876	2
32814-32913	32863	0.00867	0.00876	2
32839-32938	32888	0.00533	0.00438	1
32864-32963	32913	0.00867	0.00876	2
32889-32988	32938	0.01533	0.01752	4
32914-33013	32963	0.01	0.01314	3
32939-33038	32988	0.01	0.01314	3
32964-33063	33013	0.01667	0.0219	5
32989-33088	33038	0.01	0.01314	3
33014-33113	33063	0.01	0.01314	3
33039-33138	33088	0.01	0.01314	3
33064-33163	33113	0	0	0
33089-33188	33138	0	0	0
33114-33213	33163	0	0	0
33139-33238	33188	0.00867	0.00876	2
33164-33263	33213	0.014	0.01314	3
33189-33288	33238	0.014	0.01314	3
33214-33315	33263	0.014	0.01314	3
33239-33340	33288	0.01133	0.00876	2
33264-33365	33315	0.006	0.00438	1
33289-33417	33340	0.01933	0.0219	5
33316-33442	33365	0.04467	0.05255	12
33341-33467	33417	0.03867	0.04818	11
33366-33492	33442	0.03867	0.04818	11
33418-33517	33467	0.02533	0.03066	7
33443-33542	33492	0	0	0
33468-33567	33517	0	0	0
33493-33592	33542	0	0	0
33518-33617	33567	0.00333	0.00438	1
33543-33664	33592	0.00333	0.00438	1
33568-33691	33617	0.014	0.01314	3
33593-33735	33664	0.014	0.01314	3
33618-33760	33691	0.01067	0.00876	2
33665-33785	33735	0.014	0.01314	3
33692-33810	33760	0.012	0.01314	3
33736-33837	33785	0.012	0.01314	3
33761-33862	33810	0.012	0.01314	3
33786-33887	33837	0.01533	0.01752	4
33811-33912	33862	0.00667	0.00876	2
33838-33937	33887	0.00667	0.00876	2
33863-33963	33912	0.012	0.01314	3
33888-33988	33937	0.00867	0.00876	2
33913-34013	33963	0.00867	0.00876	2
33938-34038	33988	0.00867	0.00876	2
33964-34080	34013	0.00867	0.00876	2
33989-34105	34038	0.00533	0.00438	1
34014-34131	34080	0.00533	0.00438	1
34039-34156	34105	0.01133	0.00876	2
34081-34181	34131	0.006	0.00438	1
34106-34207	34156	0.01133	0.00876	2
34132-34232	34181	0.01133	0.00876	2
34157-34257	34207	0.00533	0.00438	1
34182-34282	34232	0.00867	0.00876	2
34208-34307	34257	0.00667	0.00876	2
34233-34332	34282	0.01333	0.01752	4
34258-34357	34307	0.01867	0.0219	5
34283-34382	34332	0.01533	0.01752	4
34308-34407	34357	0.012	0.01314	3
34333-34436	34382	0.00867	0.00876	2
34358-34461	34407	0.00333	0.00438	1
34383-34495	34436	0.00333	0.00438	1
34408-34520	34461	0.00667	0.00876	2
34437-34545	34495	0.00333	0.00438	1
34462-34570	34520	0.00333	0.00438	1
34496-34595	34545	0.00333	0.00438	1
34521-34620	34570	0	0	0
34546-34645	34595	0.00533	0.00438	1
34571-34670	34620	0.00533	0.00438	1
34596-34695	34645	0.00867	0.00876	2
34621-34720	34670	0.00867	0.00876	2
34646-34745	34695	0.00333	0.00438	1
34671-34770	34720	0.00667	0.00876	2
34696-34811	34745	0.00333	0.00438	1
34721-34836	34770	0.00333	0.00438	1
34746-34861	34811	0.00933	0.00876	2
34771-34886	34836	0.006	0.00438	1
34812-34925	34861	0.006	0.00438	1
34837-34957	34886	0.006	0.00438	1
34862-34982	34925	0	0	0
34887-35007	34957	0	0	0
34926-35032	34982	0	0	0
34958-35057	35007	0.00333	0.00438	1
34983-35082	35032	0.00333	0.00438	1
35008-35107	35057	0.00867	0.00876	2
35033-35132	35082	0.00867	0.00876	2
35058-35157	35107	0.00533	0.00438	1
35083-35182	35132	0.00533	0.00438	1
35108-35207	35157	0	0	0
35133-35232	35182	0	0	0
35158-35257	35207	0	0	0
35183-35282	35232	0	0	0
35208-35307	35257	0	0	0
35233-35332	35282	0	0	0
35258-35357	35307	0	0	0
35283-35382	35332	0	0	0
35308-35407	35357	0	0	0
35333-35432	35382	0	0	0
35358-35457	35407	0	0	0
35383-35482	35432	0	0	0
35408-35507	35457	0	0	0
35433-35532	35482	0	0	0
35458-35557	35507	0	0	0
35483-35582	35532	0	0	0
35508-35607	35557	0	0	0
35533-35632	35582	0	0	0
35558-35657	35607	0	0	0
35583-35682	35632	0	0	0
35608-35707	35657	0	0	0
35633-35732	35682	0	0	0
35658-35757	35707	0.00333	0.00438	1
35683-35782	35732	0.00333	0.00438	1
35708-35807	35757	0.00333	0.00438	1
35733-35832	35782	0.00333	0.00438	1
35758-35857	35807	0.00333	0.00438	1
35783-35882	35832	0.00333	0.00438	1
35808-35907	35857	0.00333	0.00438	1
35833-35932	35882	0.00867	0.00876	2
35858-35957	35907	0.00533	0.00438	1
35883-35982	35932	0.00533	0.00438	1
35908-36007	35957	0.00533	0.00438	1
35933-36032	35982	0	0	0
35958-36057	36007	0	0	0
35983-36082	36032	0	0	0
36008-36107	36057	0	0	0
36033-36132	36082	0	0	0
36058-36157	36107	0	0	0
36083-36182	36132	0	0	0
36108-36207	36157	0	0	0
36133-36232	36182	0	0	0
36158-36257	36207	0	0	0
36183-36282	36232	0	0	0
36208-36307	36257	0	0	0
36233-36332	36282	0	0	0
36258-36357	36307	0	0	0
36283-36382	36332	0.00333	0.00438	1
36308-36407	36357	0.00333	0.00438	1
36333-36432	36382	0.00333	0.00438	1
36358-36457	36407	0.00333	0.00438	1
36383-36482	36432	0	0	0
36408-36507	36457	0	0	0
36433-36532	36482	0	0	0
36458-36557	36507	0	0	0
36483-36582	36532	0.00333	0.00438	1
36508-36607	36557	0.00333	0.00438	1
36533-36632	36582	0.00333	0.00438	1
36558-36657	36607	0.00333	0.00438	1
36583-36682	36632	0	0	0
36608-36707	36657	0	0	0
36633-36732	36682	0	0	0
36658-36757	36707	0	0	0
36683-36782	36732	0	0	0
36708-36807	36757	0	0	0
36733-36832	36782	0	0	0
36758-36857	36807	0	0	0
36783-36882	36832	0	0	0
36808-36907	36857	0	0	0
36833-36932	36882	0	0	0
36858-36957	36907	0.006	0.00438	1
36883-36982	36932	0.006	0.00438	1
36908-37007	36957	0.006	0.00438	1
36933-37032	36982	0.006	0.00438	1
36958-37057	37007	0	0	0
36983-37082	37032	0	0	0
37008-37107	37057	0.006	0.00438	1
37033-37132	37082	0.006	0.00438	1
37058-37157	37107	0.006	0.00438	1
37083-37182	37132	0.006	0.00438	1
37108-37207	37157	0	0	0
37133-37232	37182	0	0	0
37158-37257	37207	0	0	0
37183-37282	37232	0	0	0
37208-37307	37257	0	0	0
37233-37332	37282	0	0	0
37258-37357	37307	0.00333	0.00438	1
37283-37382	37332	0.00333	0.00438	1
37308-37407	37357	0.00333	0.00438	1
37333-37432	37382	0.00333	0.00438	1
37358-37457	37407	0.00533	0.00438	1
37383-37482	37432	0.00533	0.00438	1
37408-37507	37457	0.00533	0.00438	1
37433-37532	37482	0.00533	0.00438	1
37458-37559	37507	0.01067	0.00876	2
37483-37584	37532	0.01067	0.00876	2
37508-37609	37559	0.01067	0.00876	2
37533-37634	37584	0.01067	0.00876	2
37560-37659	37609	0	0	0
37585-37684	37634	0	0	0
37610-37709	37659	0.00533	0.00438	1
37635-37734	37684	0.00533	0.00438	1
37660-37759	37709	0.00533	0.00438	1
37685-37818	37734	0.00533	0.00438	1
37710-37843	37759	0	0	0
37735-37869	37818	0	0	0
37760-37894	37843	0	0	0
37819-37919	37869	0	0	0
37844-37944	37894	0	0	0
37870-37969	37919	0	0	0
37895-37994	37944	0	0	0
37920-38019	37969	0	0	0
37945-38044	37994	0	0	0
37970-38069	38019	0.00333	0.00438	1
37995-38094	38044	0.00333	0.00438	1
38020-38119	38069	0.00333	0.00438	1
38045-38144	38094	0.00333	0.00438	1
38070-38169	38119	0	0	0
38095-38194	38144	0	0	0
38120-38219	38169	0	0	0
38145-38244	38194	0	0	0
38170-38269	38219	0	0	0
38195-38294	38244	0.00333	0.00438	1
38220-38319	38269	0.00333	0.00438	1
38245-38344	38294	0.00333	0.00438	1
38270-38369	38319	0.00333	0.00438	1
38295-38394	38344	0	0	0
38320-38419	38369	0	0	0
38345-38444	38394	0	0	0
38370-38469	38419	0	0	0
38395-38494	38444	0	0	0
38420-38519	38469	0	0	0
38445-38544	38494	0	0	0
38470-38569	38519	0	0	0
38495-38594	38544	0.00333	0.00438	1
38520-38619	38569	0.00333	0.00438	1
38545-38644	38594	0.00667	0.00876	2
38570-38669	38619	0.00667	0.00876	2
38595-38694	38644	0.00933	0.00876	2
38620-38719	38669	0.00933	0.00876	2
38645-38744	38694	0.006	0.00438	1
38670-38769	38719	0.006	0.00438	1
38695-38794	38744	0	0	0
38720-38819	38769	0.00333	0.00438	1
38745-38844	38794	0.00333	0.00438	1
38770-38869	38819	0.00333	0.00438	1
38795-38894	38844	0.00333	0.00438	1
38820-38919	38869	0	0	0
38845-38944	38894	0	0	0
38870-38969	38919	0	0	0
38895-38994	38944	0	0	0
38920-39019	38969	0	0	0
38945-39044	38994	0.00533	0.00438	1
38970-39069	39019	0.00533	0.00438	1
38995-39094	39044	0.00533	0.00438	1
39020-39119	39069	0.00533	0.00438	1
39045-39144	39094	0	0	0
39070-39169	39119	0	0	0
39095-39194	39144	0	0	0
39120-39219	39169	0	0	0
39145-39244	39194	0	0	0
39170-39269	39219	0	0	0
39195-39294	39244	0	0	0
39220-39319	39269	0.01067	0.00876	2
39245-39344	39294	0.01067	0.00876	2
39270-39378	39319	0.01933	0.01752	4
39295-39403	39344	0.02267	0.0219	5
39320-39428	39378	0.012	0.01314	3
39345-39453	39403	0.012	0.01314	3
39379-39478	39428	0.00333	0.00438	1
39404-39503	39453	0	0	0
39429-39528	39478	0	0	0
39454-39553	39503	0	0	0
39479-39578	39528	0	0	0
39504-39603	39553	0	0	0
39529-39628	39578	0.00333	0.00438	1
39554-39653	39603	0.00333	0.00438	1
39579-39678	39628	0.00333	0.00438	1
39604-39703	39653	0.00333	0.00438	1
39629-39728	39678	0	0	0
39654-39753	39703	0	0	0
39679-39778	39728	0	0	0
39704-39803	39753	0	0	0
39729-39828	39778	0	0	0
39754-39853	39803	0	0	0
39779-39878	39828	0	0	0
39804-39903	39853	0.00667	0.00876	2
39829-39928	39878	0.01	0.01314	3
39854-39953	39903	0.01	0.01314	3
39879-39978	39928	0.01	0.01314	3
39904-40003	39953	0.00333	0.00438	1
39929-40028	39978	0	0	0
39954-40053	40003	0.00333	0.00438	1
39979-40078	40028	0.01267	0.01314	3
40004-40103	40053	0.01267	0.01314	3
40029-40128	40078	0.01267	0.01314	3
40054-40153	40103	0.00933	0.00876	2
40079-40178	40128	0	0	0
40104-40203	40153	0	0	0
40129-40228	40178	0.00533	0.00438	1
40154-40253	40203	0.00533	0.00438	1
40179-40278	40228	0.00533	0.00438	1
40204-40303	40253	0.00533	0.00438	1
40229-40328	40278	0	0	0
40254-40353	40303	0.006	0.00438	1
40279-40378	40328	0.006	0.00438	1
40304-40403	40353	0.006	0.00438	1
40329-40428	40378	0.006	0.00438	1
40354-40453	40403	0	0	0
40379-40478	40428	0	0	0
40404-40503	40453	0	0	0
40429-40528	40478	0	0	0
40454-40553	40503	0	0	0
40479-40578	40528	0	0	0
40504-40603	40553	0	0	0
40529-40628	40578	0	0	0
40554-40653	40603	0	0	0
40579-40678	40628	0	0	0
40604-40703	40653	0	0	0
40629-40728	40678	0	0	0
40654-40753	40703	0	0	0
40679-40778	40728	0	0	0
40704-40803	40753	0	0	0
40729-40828	40778	0	0	0
40754-40853	40803	0.006	0.00438	1
40779-40878	40828	0.006	0.00438	1
40804-40903	40853	0.006	0.00438	1
40829-40928	40878	0.006	0.00438	1
40854-40953	40903	0	0	0
40879-40978	40928	0	0	0
40904-41003	40953	0	0	0
40929-41028	40978	0	0	0
40954-41053	41003	0	0	0
40979-41078	41028	0	0	0
41004-41103	41053	0	0	0
41029-41128	41078	0	0	0
41054-41153	41103	0	0	0
41079-41178	41128	0	0	0
41104-41203	41153	0	0	0
41129-41228	41178	0	0	0
41154-41253	41203	0	0	0
41179-41278	41228	0	0	0
41204-41303	41253	0	0	0
41229-41328	41278	0	0	0
41254-41353	41303	0	0	0
41279-41378	41328	0	0	0
41304-41403	41353	0	0	0
41329-41428	41378	0	0	0
41354-41453	41403	0	0	0
41379-41478	41428	0	0	0
41404-41503	41453	0	0	0
41429-41528	41478	0	0	0
41454-41553	41503	0	0	0
41479-41578	41528	0	0	0
41504-41603	41553	0	0	0
41529-41628	41578	0	0	0
41554-41653	41603	0	0	0
41579-41678	41628	0	0	0
41604-41703	41653	0	0	0
41629-41728	41678	0	0	0
41654-41753	41703	0	0	0
41679-41778	41728	0	0	0
41704-41803	41753	0	0	0
41729-41828	41778	0	0	0
41754-41853	41803	0	0	0
41779-41878	41828	0	0	0
41804-41903	41853	0	0	0
41829-41928	41878	0	0	0
41854-41953	41903	0	0	0
41879-41978	41928	0	0	0
41904-42003	41953	0	0	0
41929-42028	41978	0	0	0
41954-42053	42003	0	0	0
41979-42078	42028	0	0	0
42004-42103	42053	0	0	0
42029-42128	42078	0	0	0
42054-42153	42103	0	0	0
42079-42178	42128	0	0	0
42104-42203	42153	0	0	0
42129-42228	42178	0	0	0
42154-42253	42203	0	0	0
42179-42278	42228	0	0	0
42204-42303	42253	0	0	0
42229-42328	42278	0	0	0
42254-42353	42303	0	0	0
42279-42378	42328	0.00333	0.00438	1
42304-42403	42353	0.00333	0.00438	1
42329-42428	42378	0.00333	0.00438	1
42354-42453	42403	0.00333	0.00438	1
42379-42478	42428	0	0	0
42404-42503	42453	0	0	0
42429-42528	42478	0	0	0
42454-42553	42503	0	0	0
42479-42578	42528	0	0	0
42504-42603	42553	0	0	0
42529-42628	42578	0	0	0
42554-42653	42603	0	0	0
42579-42678	42628	0	0	0
42604-42703	42653	0	0	0
42629-42728	42678	0	0	0
42654-42753	42703	0	0	0
42679-42778	42728	0	0	0
42704-42803	42753	0	0	0
42729-42828	42778	0	0	0
42754-42853	42803	0	0	0
42779-42878	42828	0	0	0
42804-42903	42853	0	0	0
42829-42928	42878	0	0	0
42854-42953	42903	0	0	0
42879-42978	42928	0	0	0
42904-43003	42953	0	0	0
42929-43028	42978	0	0	0
42954-43053	43003	0	0	0
42979-43078	43028	0	0	0
43004-43103	43053	0	0	0
43029-43128	43078	0	0	0
43054-43153	43103	0	0	0
43079-43178	43128	0	0	0
43104-43203	43153	0	0	0
43129-43228	43178	0	0	0
43154-43253	43203	0	0	0
43179-43278	43228	0	0	0
43204-43303	43253	0	0	0
43229-43328	43278	0	0	0
43254-43353	43303	0	0	0
43279-43378	43328	0	0	0
43304-43403	43353	0	0	0
43329-43428	43378	0	0	0
43354-43453	43403	0.00333	0.00438	1
43379-43478	43428	0.00333	0.00438	1
43404-43503	43453	0.00333	0.00438	1
43429-43528	43478	0.00333	0.00438	1
43454-43553	43503	0	0	0
43479-43578	43528	0	0	0
43504-43603	43553	0	0	0
43529-43628	43578	0	0	0
43554-43653	43603	0	0	0
43579-43678	43628	0	0	0
43604-43703	43653	0	0	0
43629-43728	43678	0	0	0
43654-43753	43703	0	0	0
43679-43778	43728	0	0	0
43704-43803	43753	0.00333	0.00438	1
43729-43828	43778	0.00333	0.00438	1
43754-43853	43803	0.00333	0.00438	1
43779-43878	43828	0.00333	0.00438	1
43804-43903	43853	0	0	0
43829-43928	43878	0.00333	0.00438	1
43854-43953	43903	0.00333	0.00438	1
43879-43978	43928	0.00333	0.00438	1
43904-44003	43953	0.00333	0.00438	1
43929-44028	43978	0	0	0
43954-44053	44003	0	0	0
43979-44078	44028	0	0	0
44004-44103	44053	0	0	0
44029-44128	44078	0	0	0
44054-44153	44103	0	0	0
44079-44178	44128	0	0	0
44104-44203	44153	0.01067	0.00876	2
44129-44228	44178	0.01067	0.00876	2
44154-44253	44203	0.01067	0.00876	2
44179-44278	44228	0.01667	0.01314	3
44204-44303	44253	0.01133	0.00876	2
44229-44328	44278	0.01133	0.00876	2
44254-44353	44303	0.01133	0.00876	2
44279-44378	44328	0.00533	0.00438	1
44304-44403	44353	0	0	0
44329-44428	44378	0.00333	0.00438	1
44354-44456	44403	0.00333	0.00438	1
44379-44481	44428	0.00333	0.00438	1
44404-44506	44456	0.00333	0.00438	1
44429-44531	44481	0	0	0
44457-44556	44506	0	0	0
44482-44581	44531	0	0	0
44507-44606	44556	0	0	0
44532-44631	44581	0	0	0
44557-44656	44606	0	0	0
44582-44681	44631	0	0	0
44607-44706	44656	0	0	0
44632-44731	44681	0	0	0
44657-44756	44706	0.00533	0.00438	1
44682-44781	44731	0.00533	0.00438	1
44707-44806	44756	0.01067	0.00876	2
44732-44831	44781	0.01067	0.00876	2
44757-44856	44806	0.00533	0.00438	1
44782-44881	44831	0.00533	0.00438	1
44807-44906	44856	0.00333	0.00438	1
44832-44931	44881	0.00933	0.00876	2
44857-44956	44906	0.00933	0.00876	2
44882-44981	44931	0.00933	0.00876	2
44907-45006	44956	0.012	0.00876	2
44932-45031	44981	0.006	0.00438	1
44957-45056	45006	0.006	0.00438	1
44982-45081	45031	0.012	0.00876	2
45007-45106	45056	0.006	0.00438	1
45032-45131	45081	0.006	0.00438	1
45057-45156	45106	0.006	0.00438	1
45082-45181	45131	0	0	0
45107-45206	45156	0	0	0
45132-45231	45181	0	0	0
45157-45256	45206	0	0	0
45182-45281	45231	0	0	0
45207-45317	45256	0	0	0
45232-45342	45281	0.00333	0.00438	1
45257-45367	45317	0.00333	0.00438	1
45282-45392	45342	0.00333	0.00438	1
45318-45417	45367	0.00333	0.00438	1
45343-45442	45392	0	0	0
45368-45467	45417	0	0	0
45393-45492	45442	0	0	0
45418-45517	45467	0	0	0
45443-45542	45492	0.00333	0.00438	1
45468-45567	45517	0.00333	0.00438	1
45493-45592	45542	0.00333	0.00438	1
45518-45617	45567	0.00333	0.00438	1
45543-45642	45592	0	0	0
45568-45667	45617	0	0	0
45593-45692	45642	0	0	0
45618-45717	45667	0	0	0
45643-45742	45692	0	0	0
45668-45767	45717	0	0	0
45693-45792	45742	0	0	0
45718-45817	45767	0	0	0
45743-45842	45792	0	0	0
45768-45867	45817	0.00867	0.00876	2
45793-45892	45842	0.00867	0.00876	2
45818-45917	45867	0.00867	0.00876	2
45843-45942	45892	0.00867	0.00876	2
45868-45973	45917	0	0	0
45893-45998	45942	0.00333	0.00438	1
45918-46023	45973	0.00333	0.00438	1
45943-46048	45998	0.00333	0.00438	1
45974-46073	46023	0.00333	0.00438	1
45999-46098	46048	0.00333	0.00438	1
46024-46123	46073	0.00333	0.00438	1
46049-46148	46098	0.012	0.01314	3
46074-46173	46123	0.012	0.01314	3
46099-46198	46148	0.00867	0.00876	2
46124-46223	46173	0.00867	0.00876	2
46149-46250	46198	0	0	0
46174-46275	46223	0	0	0
46199-46300	46250	0.00333	0.00438	1
46224-46325	46275	0.00333	0.00438	1
46251-46350	46300	0.00333	0.00438	1
46276-46375	46325	0.00333	0.00438	1
46301-46400	46350	0	0	0
46326-46425	46375	0	0	0
46351-46450	46400	0	0	0
46376-46475	46425	0	0	0
46401-46500	46450	0.00333	0.00438	1
46426-46525	46475	0.00333	0.00438	1
46451-46551	46500	0.00333	0.00438	1
46476-46576	46525	0.00333	0.00438	1
46501-46601	46551	0	0	0
46526-46626	46576	0	0	0
46552-46651	46601	0	0	0
46577-46676	46626	0	0	0
46602-46701	46651	0	0	0
46627-46726	46676	0	0	0
46652-46752	46701	0	0	0
46677-46777	46726	0.00333	0.00438	1
46702-46802	46752	0.00667	0.00876	2
46727-46827	46777	0.00667	0.00876	2
46753-46852	46802	0.01533	0.01752	4
46778-46877	46827	0.012	0.01314	3
46803-46902	46852	0.00867	0.00876	2
46828-46929	46877	0.00867	0.00876	2
46853-46954	46902	0.00933	0.00876	2
46878-46979	46929	0.00933	0.00876	2
46903-47004	46954	0.00933	0.00876	2
46930-47029	46979	0.00933	0.00876	2
46955-47054	47004	0	0	0
46980-47079	47029	0	0	0
47005-47104	47054	0	0	0
47030-47134	47079	0	0	0
47055-47160	47104	0	0	0
47080-47185	47134	0	0	0
47105-47210	47160	0	0	0
47135-47246	47185	0	0	0
47161-47271	47210	0.00333	0.00438	1
47186-47296	47246	0.00333	0.00438	1
47211-47321	47271	0.00333	0.00438	1
47247-47346	47296	0.00667	0.00876	2
47272-47371	47321	0.00667	0.00876	2
47297-47396	47346	0.00667	0.00876	2
47322-47421	47371	0.00667	0.00876	2
47347-47446	47396	0.00333	0.00438	1
47372-47471	47421	0	0	0
47397-47496	47446	0	0	0
47422-47521	47471	0	0	0
47447-47546	47496	0	0	0
47472-47571	47521	0	0	0
47497-47596	47546	0.00867	0.00876	2
47522-47621	47571	0.01467	0.01314	3
47547-47646	47596	0.01467	0.01314	3
47572-47671	47621	0.01467	0.01314	3
47597-47696	47646	0.006	0.00438	1
47622-47721	47671	0	0	0
47647-47746	47696	0	0	0
47672-47771	47721	0	0	0
47697-47796	47746	0	0	0
47722-47821	47771	0	0	0
47747-47846	47796	0	0	0
47772-47871	47821	0	0	0
47797-47896	47846	0	0	0
47822-47921	47871	0	0	0
47847-47946	47896	0	0	0
47872-47971	47921	0	0	0
47897-47996	47946	0.00667	0.00876	2
47922-48021	47971	0.00667	0.00876	2
47947-48046	47996	0.00667	0.00876	2
47972-48072	48021	0.00667	0.00876	2
47997-48097	48046	0	0	0
48022-48122	48072	0.006	0.00438	1
48047-48147	48097	0.006	0.00438	1
48073-48172	48122	0.006	0.00438	1
48098-48197	48147	0.00933	0.00876	2
48123-48222	48172	0.00333	0.00438	1
48148-48247	48197	0.00333	0.00438	1
48173-48272	48222	0.00333	0.00438	1
48198-48297	48247	0.00533	0.00438	1
48223-48322	48272	0.00533	0.00438	1
48248-48347	48297	0.00533	0.00438	1
48273-48373	48322	0.00533	0.00438	1
48298-48398	48347	0	0	0
48323-48423	48373	0	0	0
48348-48448	48398	0	0	0
48374-48480	48423	0.00533	0.00438	1
48399-48505	48448	0.00867	0.00876	2
48424-48547	48480	0.02	0.01752	4
48449-48592	48505	0.02533	0.0219	5
48481-48617	48547	0.02	0.01752	4
48506-48642	48592	0.01667	0.01314	3
48548-48667	48617	0.00533	0.00438	1
48593-48692	48642	0.00533	0.00438	1
48618-48717	48667	0.00533	0.00438	1
48643-48744	48692	0.00533	0.00438	1
48668-48769	48717	0.00533	0.00438	1
48693-48794	48744	0.00667	0.00876	2
48718-48821	48769	0.00667	0.00876	2
48745-48846	48794	0.00667	0.00876	2
48770-48871	48821	0.00667	0.00876	2
48795-48896	48846	0.00667	0.00876	2
48822-48921	48871	0.00667	0.00876	2
48847-48946	48896	0.012	0.01314	3
48872-48971	48921	0.012	0.01314	3
48897-48996	48946	0.00533	0.00438	1
48922-49021	48971	0.00533	0.00438	1
48947-49046	48996	0	0	0
48972-49071	49021	0	0	0
48997-49096	49046	0	0	0
49022-49121	49071	0	0	0
49047-49146	49096	0	0	0
49072-49171	49121	0	0	0
49097-49196	49146	0	0	0
49122-49221	49171	0	0	0
49147-49246	49196	0.00533	0.00438	1
49172-49271	49221	0.00867	0.00876	2
49197-49296	49246	0.00867	0.00876	2
49222-49321	49271	0.012	0.01314	3
49247-49346	49296	0.02067	0.0219	5
49272-49386	49321	0.01733	0.01752	4
49297-49411	49346	0.02267	0.0219	5
49322-49461	49386	0.01933	0.01752	4
49347-49486	49411	0.01067	0.00876	2
49387-49511	49461	0.02133	0.01752	4
49412-49537	49486	0.026	0.02628	6
49462-49562	49511	0.04467	0.04818	11
49487-49627	49537	0.062	0.07007	16
49512-49675	49562	0.08067	0.09635	22
49538-49782	49627	0.09067	0.10949	25
49573-49807	49675	0.072	0.08759	20
49628-49832	49782	0.05267	0.06569	15
49676-49857	49807	0.02667	0.03504	8
49783-49882	49832	0.00667	0.00876	2
49808-49907	49857	0.012	0.01314	3
49833-49932	49882	0.00867	0.00876	2
49858-49957	49907	0.01133	0.00876	2
49883-49982	49932	0.01133	0.00876	2
49908-50007	49957	0.006	0.00438	1
49933-50032	49982	0.006	0.00438	1
49958-50058	50007	0	0	0
49983-50083	50032	0	0	0
50008-50108	50058	0	0	0
50033-50133	50083	0.00533	0.00438	1
50059-50158	50108	0.00533	0.00438	1
50084-50183	50133	0.02133	0.01752	4
50109-50208	50158	0.02733	0.0219	5
50134-50233	50183	0.022	0.01752	4
50159-50294	50208	0.02533	0.0219	5
50184-50320	50233	0.00933	0.00876	2
50209-50345	50294	0.00867	0.00876	2
50234-50370	50320	0.012	0.01314	3
50295-50395	50345	0.00867	0.00876	2
50321-50420	50370	0.00867	0.00876	2
50346-50445	50395	0.00333	0.00438	1
50371-50470	50420	0	0	0
50396-50495	50445	0	0	0
50421-50520	50470	0	0	0
50446-50545	50495	0	0	0
50471-50627	50520	0.016	0.01314	3
50496-50652	50545	0.016	0.01314	3
50521-50677	50627	0.016	0.01314	3
50546-50703	50652	0.022	0.01752	4
50628-50728	50677	0.00933	0.00876	2
50653-50753	50703	0.018	0.01752	4
50678-50778	50728	0.02933	0.02628	6
50704-50803	50753	0.02333	0.0219	5
50729-50830	50778	0.02	0.01752	4
50754-51422	50803	0.01667	0.01314	3
50779-51447	50830	0.00533	0.00438	1
50804-51472	51422	0.00533	0.00438	1
50831-51497	51447	0.00533	0.00438	1
51423-51522	51472	0.00333	0.00438	1
51448-51547	51497	0.00333	0.00438	1
51473-52509	51522	0.00667	0.00876	2
51498-52541	51547	0.01333	0.01752	4
51523-52566	52509	0.01333	0.01752	4
51548-52599	52541	0.01933	0.0219	5
52510-52635	52566	0.022	0.0219	5
52542-52691	52599	0.01533	0.01314	3
52567-52716	52635	0.012	0.00876	2
52600-52741	52691	0.006	0.00438	1
52636-52766	52716	0	0	0
52692-52791	52741	0.00333	0.00438	1
52717-52816	52766	0.00333	0.00438	1
52742-52841	52791	0.00333	0.00438	1
52767-52866	52816	0.00667	0.00876	2
52792-52891	52841	0.00333	0.00438	1
52817-52916	52866	0.00333	0.00438	1
52842-52941	52891	0.00333	0.00438	1
52867-52966	52916	0	0	0
52892-52991	52941	0	0	0
52917-53016	52966	0	0	0
52942-53041	52991	0	0	0
52967-53066	53016	0.00533	0.00438	1
52992-53091	53041	0.00533	0.00438	1
53017-53116	53066	0.00533	0.00438	1
53042-53141	53091	0.00533	0.00438	1
53067-53166	53116	0.00333	0.00438	1
53092-53191	53141	0.00333	0.00438	1
53117-53216	53166	0.00667	0.00876	2
53142-53241	53191	0.00667	0.00876	2
53167-53266	53216	0.00333	0.00438	1
53192-53291	53241	0.00333	0.00438	1
53217-53316	53266	0	0	0
53242-53341	53291	0	0	0
53267-53366	53316	0	0	0
53292-53391	53341	0	0	0
53317-53416	53366	0	0	0
53342-53441	53391	0	0	0
53367-53493	53416	0	0	0
53392-53518	53441	0.00333	0.00438	1
53417-53543	53493	0.00333	0.00438	1
53442-53568	53518	0.00867	0.00876	2
53494-53593	53543	0.00867	0.00876	2
53519-53618	53568	0.00533	0.00438	1
53544-53643	53593	0.00533	0.00438	1
53569-53668	53618	0	0	0
53594-53693	53643	0	0	0
53619-53718	53668	0	0	0
53644-53743	53693	0	0	0
53669-53768	53718	0.00333	0.00438	1
53694-53793	53743	0.00333	0.00438	1
53719-53818	53768	0.00333	0.00438	1
53744-53860	53793	0.01933	0.01752	4
53769-53885	53818	0.016	0.01314	3
53794-53910	53860	0.016	0.01314	3
53836-53935	53885	0.016	0.01314	3
53861-53960	53910	0	0	0
53886-53985	53935	0	0	0
53911-54010	53960	0.00333	0.00438	1
53936-54035	53985	0.00333	0.00438	1
53961-54060	54010	0.00333	0.00438	1
53986-54085	54035	0.00333	0.00438	1
54011-54110	54060	0	0	0
54036-54135	54085	0	0	0
54061-54160	54110	0.00333	0.00438	1
54086-54185	54135	0.00333	0.00438	1
54111-54210	54160	0.00333	0.00438	1
54136-54235	54185	0.00333	0.00438	1
54161-54260	54210	0	0	0
54186-54285	54235	0	0	0
54211-54310	54260	0	0	0
54236-54335	54285	0	0	0
54261-54360	54310	0	0	0
54286-54385	54335	0	0	0
54311-54410	54360	0	0	0
54336-54435	54385	0.00533	0.00438	1
[truncated: 3,670 more rows]
